# Supplementary material for: Understanding the roles of novel electron donors in Ziegler–Natta catalyzed propylene polymerization
Source: Royal Society of Chemistry journal article supplement (doi:10.1039/c6ra22101g), 2016-01-01
Supplement: c6ra22101g1.pdf [file c6ra22101g1.pdf]

## Electronic Supplementary Information (ESI)

### Understanding Roles of Novel Electron Donors in Ziegler–Natta Catalyzed Propylene Polymerization

Manussada Ratanasak,<sup>ab</sup> Vudhichai Parasuk<sup>\*ab</sup>

<sup>a</sup> Ph.D. Program in Nanoscience and Technology, Graduate School, Chulalongkorn University, Bangkok 10330, Thailand

<sup>b</sup> Computational Chemistry Unit Cell, Department of Chemistry, Faculty of Science, Chulalongkorn University, Bangkok 10330, Thailand.

\*Corresponding author. Tel: +6622187603; Fax: +6622187603;

E-mail address: vudhichai.p@chula.ac.th

#### Contents

Reaction coordinate (.xyz) of all structures

#### Dibenzoyl sulfide (Mono mode)

|    |             |             |             |
|----|-------------|-------------|-------------|
| Cl | 13.77390700 | -2.63919100 | -1.04710200 |
| Cl | 10.47512500 | -4.18012900 | -1.07565000 |
| Mg | 11.64423700 | -2.40583800 | 0.25187500  |
| Cl | 10.79247400 | -0.55534600 | -1.20669100 |
| Cl | 9.51456100  | -2.17238200 | 1.55094900  |
| Mg | 8.34555000  | -3.94667100 | 0.22332400  |
| Cl | 7.49368800  | -2.09618500 | -1.23524200 |
| Cl | 6.21577900  | -3.71332000 | 1.52240100  |
| Cl | 4.19500600  | -3.63711800 | -1.26379000 |
| Mg | 8.66289900  | -0.32188600 | 0.09238300  |
| Cl | 6.53312800  | -0.08853700 | 1.39136000  |
| Mg | 5.36411700  | -1.86282700 | 0.06373500  |
| Cl | 4.51235400  | -0.01233500 | -1.39483100 |
| Cl | 3.23434100  | -1.62937600 | 1.36280900  |
| Mg | 2.06533000  | -3.40366500 | 0.03518400  |
| Cl | 1.21356800  | -1.55317400 | -1.42338200 |
| Cl | -0.06434000 | -3.17031100 | 1.33416100  |
| Cl | -2.08521900 | -3.09401200 | -1.45193200 |
| Mg | 2.32667200  | 0.13578600  | -0.16942800 |
| Cl | 1.53091600  | 2.07160900  | -1.55442200 |
| Cl | 0.25300800  | 0.45447400  | 1.20322000  |
| Mg | -0.91610300 | -1.31982000 | -0.12440500 |
| Cl | -1.76786600 | 0.53067100  | -1.58297100 |
| Cl | -3.04577800 | -1.08636700 | 1.17456900  |
| Mg | -4.21479000 | -2.86065400 | -0.15295600 |
| Cl | -5.06655200 | -1.01016300 | -1.61152100 |
| Cl | -6.34456500 | -2.62720500 | 1.14601800  |
| Cl | -8.36533900 | -2.55100100 | -1.64007200 |
| Ti | -0.59875500 | 2.30496500  | -0.25534600 |
| Cl | -2.72843000 | 2.53841900  | 1.04362800  |
| Mg | -3.89744100 | 0.76412900  | -0.28399700 |
| Cl | -6.02721600 | 0.99758000  | 1.01507700  |
| Mg | -7.19622700 | -0.77670900 | -0.31254700 |

|    |              |             |             |
|----|--------------|-------------|-------------|
| Cl | -8.04799000  | 1.07378200  | -1.77111300 |
| Cl | -9.32589800  | -0.54335600 | 0.98642900  |
| Mg | -10.49500900 | -2.31764800 | -0.34109600 |
| Cl | -11.34677200 | -0.46715600 | -1.79966200 |
| Cl | -12.62468500 | -2.08419400 | 0.95787900  |
| Mg | -10.17766100 | 1.30713500  | -0.47213700 |
| Cl | -12.30733600 | 1.54058900  | 0.82683800  |
| Mg | -13.47634700 | -0.23369800 | -0.50068700 |
| Cl | -15.60611800 | -0.00034900 | 0.79828900  |
| Cl | 0.73361000   | 4.11774000  | -0.28962300 |
| Cl | -1.71489000  | 4.25576400  | -0.36016800 |
| S  | 4.54856600   | 4.34983300  | 0.88611400  |
| C  | 3.85076600   | 2.83218600  | 1.63133800  |
| O  | 3.32933100   | 1.90976300  | 1.01573600  |
| C  | 4.75296900   | 4.00896600  | -0.93981500 |
| O  | 4.36761200   | 2.99365000  | -1.46166200 |
| C  | 5.45527100   | 5.10098000  | -1.67561500 |
| C  | 3.92289600   | 2.87665600  | 3.12185200  |
| C  | 5.85753600   | 6.32257100  | -1.10805800 |
| C  | 6.50295400   | 7.27952300  | -1.89650400 |
| C  | 6.76261800   | 7.02355200  | -3.24794900 |
| C  | 6.36623600   | 5.80697900  | -3.81800100 |
| C  | 5.71885800   | 4.85166300  | -3.03730000 |
| C  | 4.68632000   | 3.82922000  | 3.82456800  |
| C  | 4.68375300   | 3.84797300  | 5.21899900  |
| C  | 3.92510200   | 2.91253800  | 5.93027900  |
| C  | 3.17337300   | 1.95311500  | 5.24155800  |
| C  | 3.17078200   | 1.93332600  | 3.84713400  |
| H  | 5.66422900   | 6.54040100  | -0.05691800 |
| H  | 6.80595800   | 8.22997400  | -1.45527700 |
| H  | 7.26768300   | 7.77284200  | -3.86011000 |
| H  | 6.56427000   | 5.59972800  | -4.87136500 |
| H  | 5.40291900   | 3.89869800  | -3.46190800 |
| H  | 5.29401700   | 4.55273900  | 3.28233400  |
| H  | 5.28029000   | 4.59196000  | 5.74974700  |
| H  | 3.92448400   | 2.92708900  | 7.02133200  |
| H  | 2.58786100   | 1.21681900  | 5.79385300  |
| H  | 2.58690900   | 1.18869800  | 3.30683900  |

#### Dibenzoyl sulfide (Chelate mode)

|    |              |             |             |
|----|--------------|-------------|-------------|
| Cl | -12.96633700 | -2.54844200 | 1.20485200  |
| Cl | -9.64352400  | -4.02825300 | 1.36713700  |
| Mg | -10.84701200 | -2.41485300 | -0.12477400 |
| Cl | -10.01744800 | -0.41398400 | 1.13442300  |
| Cl | -8.72769000  | -2.28116800 | -1.45450900 |
| Mg | -7.52429300  | -3.89456000 | 0.03749900  |
| Cl | -6.69464300  | -1.89369700 | 1.29670400  |
| Cl | -5.40487200  | -3.76098000 | -1.29222600 |
| Cl | -3.37191900  | -3.37350200 | 1.45898300  |
| Mg | -7.89821100  | -0.28029200 | -0.19531900 |
| Cl | -5.77880000  | -0.14670800 | -1.52494400 |
| Mg | -4.57540800  | -1.76009900 | -0.03292800 |
| Cl | -3.74584400  | 0.24076900  | 1.22626800  |
| Cl | -2.45598100  | -1.62642000 | -1.36266400 |
| Mg | -1.25259100  | -3.23981200 | 0.12934800  |
| Cl | -0.42302700  | -1.23894200 | 1.38854500  |
| Cl | 0.86673300   | -3.10622100 | -1.20028000 |
| Cl | 2.89978900   | -2.71865400 | 1.55082200  |

|    |              |             |             |
|----|--------------|-------------|-------------|
| Mg | -1.56880900  | 0.29784300  | -0.02193800 |
| Cl | -0.79695300  | 2.37532900  | 1.15583000  |
| Cl | 0.49280700   | 0.50804300  | -1.43309400 |
| Mg | 1.69629700   | -1.10535100 | 0.05891800  |
| Cl | 2.52586100   | 0.89551800  | 1.31811500  |
| Cl | 3.81562400   | -0.97166100 | -1.27071800 |
| Mg | 5.01901400   | -2.58506000 | 0.22119400  |
| Cl | 5.84857800   | -0.58419100 | 1.48039200  |
| Cl | 7.13844100   | -2.45137300 | -1.10844100 |
| Cl | 9.17139400   | -2.06390300 | 1.64266800  |
| Ti | 1.32237100   | 2.50891200  | -0.17389700 |
| Cl | 3.44169900   | 2.64260300  | -1.50353300 |
| Mg | 4.64508800   | 1.02921100  | -0.01152100 |
| Cl | 6.76451500   | 1.16289100  | -1.34125600 |
| Mg | 7.96790500   | -0.45050000 | 0.15075600  |
| Cl | 8.79746900   | 1.55036900  | 1.40995300  |
| Cl | 10.08722900  | -0.31691000 | -1.17887100 |
| Mg | 11.29071800  | -1.93031200 | 0.31304100  |
| Cl | 12.12028200  | 0.07055800  | 1.57223800  |
| Cl | 13.41004600  | -1.79662100 | -1.01659400 |
| Mg | 10.91679300  | 1.68396000  | 0.08032600  |
| Cl | 13.03612000  | 1.81765000  | -1.24930900 |
| Mg | 14.23951000  | 0.20425100  | 0.24260300  |
| Cl | 16.35893400  | 0.33783900  | -1.08702500 |
| Cl | -0.03828000  | 4.29541200  | -0.31378400 |
| Cl | 2.40805000   | 4.47710200  | -0.27334500 |
| S  | -9.17810700  | 3.27496300  | -0.01962200 |
| C  | -9.67368300  | 1.93665600  | -1.13464900 |
| O  | -8.90704000  | 1.03715400  | -1.46793000 |
| C  | -7.64796400  | 2.64670700  | 0.75971400  |
| O  | -7.37788000  | 1.45428300  | 0.78348700  |
| C  | -6.78826900  | 3.65626600  | 1.39925300  |
| C  | -11.03698400 | 2.04121600  | -1.68142100 |
| C  | -7.01128600  | 5.04299900  | 1.29659400  |
| C  | -6.13714200  | 5.93185900  | 1.91468600  |
| C  | -5.03563200  | 5.44908500  | 2.63044500  |
| C  | -4.80603400  | 4.07283700  | 2.73064400  |
| C  | -5.67685700  | 3.17561200  | 2.12169100  |
| C  | -12.06044800 | 2.76745500  | -1.04698500 |
| C  | -13.34281600 | 2.77200000  | -1.59001700 |
| C  | -13.60916500 | 2.06457500  | -2.76592300 |
| C  | -12.59295000 | 1.34117600  | -3.40210300 |
| C  | -11.31227700 | 1.32016100  | -2.86078900 |
| H  | -7.84818900  | 5.43203100  | 0.72621900  |
| H  | -6.30845100  | 7.00038800  | 1.83230600  |
| H  | -4.35384600  | 6.14814100  | 3.10615800  |
| H  | -3.94725700  | 3.69715400  | 3.27758000  |
| H  | -5.50141000  | 2.10850800  | 2.18043200  |
| H  | -11.86983900 | 3.28733300  | -0.11433300 |
| H  | -14.13743900 | 3.31418300  | -1.08803900 |
| H  | -14.61146800 | 2.07009600  | -3.18371400 |
| H  | -12.80322600 | 0.79455800  | -4.31609300 |
| H  | -10.51121900 | 0.76421200  | -3.33636000 |

**Dibenzoyl sulfide (Bridge mode)**

|    |              |             |             |
|----|--------------|-------------|-------------|
| Cl | -13.43278800 | -2.76452400 | 0.70424300  |
| Cl | -10.11246900 | -4.14323600 | 1.28035200  |
| Mg | -11.24968500 | -2.82788900 | -0.52349300 |

|    |              |             |             |
|----|--------------|-------------|-------------|
| Cl | -10.49876100 | -0.62839800 | 0.41223400  |
| Cl | -9.06657500  | -2.89118100 | -1.75135100 |
| Mg | -7.92946300  | -4.20650200 | 0.05258500  |
| Cl | -7.17843900  | -2.00701300 | 0.98831700  |
| Cl | -5.74625500  | -4.26989400 | -1.17524300 |
| Cl | -3.85821900  | -3.38572400 | 1.56442000  |
| Mg | -8.31575000  | -0.69168900 | -0.81562900 |
| Cl | -6.13254700  | -0.75505600 | -2.04336000 |
| Mg | -4.99543500  | -2.07037700 | -0.23942400 |
| Cl | -4.24451000  | 0.12911400  | 0.69630300  |
| Cl | -2.81222500  | -2.13367100 | -1.46727700 |
| Mg | -1.67511300  | -3.44899200 | 0.33665900  |
| Cl | -0.92418800  | -1.24950200 | 1.27238600  |
| Cl | 0.50799000   | -3.51235700 | -0.89107700 |
| Cl | 2.39613400   | -2.62811700 | 1.84847000  |
| Mg | -2.00738200  | 0.00520300  | -0.43535900 |
| Cl | -1.31048000  | 2.26533600  | 0.40426900  |
| Cl | 0.12170300   | 0.00245600  | -1.75929200 |
| Mg | 1.25891500   | -1.31286700 | 0.04465000  |
| Cl | 2.00984000   | 0.88662400  | 0.98037700  |
| Cl | 3.44202000   | -1.37613500 | -1.18311100 |
| Mg | 4.57913700   | -2.69148000 | 0.62072800  |
| Cl | 5.33006200   | -0.49199000 | 1.55645500  |
| Cl | 6.76234200   | -2.75475000 | -0.60702800 |
| Cl | 8.65038400   | -1.87060500 | 2.13253900  |
| Ti | 0.87262800   | 2.20194700  | -0.82356500 |
| Cl | 3.05573400   | 2.13867900  | -2.05132600 |
| Mg | 4.19284500   | 0.82335700  | -0.24739000 |
| Cl | 6.37605600   | 0.76006300  | -1.47524200 |
| Mg | 7.51316700   | -0.55525800 | 0.32869400  |
| Cl | 8.26409200   | 1.64423300  | 1.26442100  |
| Cl | 9.69627100   | -0.61862300 | -0.89904200 |
| Mg | 10.83348700  | -1.93397000 | 0.90480200  |
| Cl | 11.58441200  | 0.26552000  | 1.84052900  |
| Cl | 13.01659300  | -1.99723800 | -0.32295900 |
| Mg | 10.44719500  | 1.58086800  | 0.03668500  |
| Cl | 12.63030100  | 1.51760000  | -1.19107600 |
| Mg | 13.76741800  | 0.20225400  | 0.61276300  |
| Cl | 15.95062100  | 0.13888800  | -0.61496800 |
| Cl | -0.49133200  | 3.91689600  | -1.33452800 |
| Cl | 1.94849800   | 4.14055700  | -1.20652300 |
| S  | -5.99229700  | 2.63886600  | -1.37533300 |
| C  | -5.23636600  | 4.31177000  | -0.83414100 |
| O  | -4.89894100  | 5.03843400  | -1.74330100 |
| C  | -7.57166900  | 2.45327000  | -0.59354100 |
| O  | -8.14765400  | 1.34567100  | -0.62064300 |
| C  | -8.22118800  | 3.60755600  | 0.05762000  |
| C  | -4.94131600  | 4.54958900  | 0.59805900  |
| C  | -8.18163400  | 4.89787700  | -0.50078200 |
| C  | -8.82033100  | 5.95352800  | 0.15056300  |
| C  | -9.48112200  | 5.73238300  | 1.36506900  |
| C  | -9.53851800  | 4.44340800  | 1.91302300  |
| C  | -8.92783900  | 3.37722600  | 1.25292900  |
| C  | -4.47902100  | 5.83623400  | 0.94839300  |
| C  | -4.08760000  | 6.10852400  | 2.25820400  |
| C  | -4.13621000  | 5.09631900  | 3.22694100  |
| C  | -4.60467900  | 3.82351600  | 2.88690800  |
| C  | -5.01385400  | 3.54681300  | 1.58011700  |

|   |              |            |             |
|---|--------------|------------|-------------|
| H | -7.68900400  | 5.06081700 | -1.45930400 |
| H | -8.79981000  | 6.94870200 | -0.29609000 |
| H | -9.96048600  | 6.56346400 | 1.88296300  |
| H | -10.06009100 | 4.26647700 | 2.85681500  |
| H | -8.98188400  | 2.36656200 | 1.66185300  |
| H | -4.42190100  | 6.60774600 | 0.17931000  |
| H | -3.73617100  | 7.10838600 | 2.51939000  |
| H | -3.79423100  | 5.29644400 | 4.24442900  |
| H | -4.64110700  | 3.03026000 | 3.63449700  |
| H | -5.33006900  | 2.53848300 | 1.31751200  |

**Dibenzoyl sulfide (Zip mode)**

|    |              |             |             |
|----|--------------|-------------|-------------|
| Cl | 14.79939000  | -0.60115300 | -1.88280900 |
| Cl | 11.53096500  | -0.24400300 | -3.44701200 |
| Mg | 12.74558400  | -2.01084500 | -2.15074100 |
| Cl | 11.77914500  | -1.26801600 | 0.03830200  |
| Cl | 10.69167800  | -3.42054100 | -2.41866800 |
| Mg | 9.47715900   | -1.65369500 | -3.71494400 |
| Cl | 8.51071300   | -0.91083700 | -1.52599700 |
| Cl | 7.42325300   | -3.06339100 | -3.98287100 |
| Cl | 5.24228800   | -0.55368700 | -3.09020000 |
| Mg | 9.72533900   | -2.67770700 | -0.22963000 |
| Cl | 7.67143300   | -4.08740400 | -0.49755700 |
| Mg | 6.45704800   | -2.32076500 | -1.79376900 |
| Cl | 5.43573400   | -1.48142800 | 0.33721600  |
| Cl | 4.40304300   | -3.73037300 | -2.06177800 |
| Mg | 3.18852600   | -1.96334300 | -3.35812500 |
| Cl | 2.22218200   | -1.22063600 | -1.16947500 |
| Cl | 1.13457600   | -3.37307500 | -3.62605900 |
| Cl | -1.04638900  | -0.86337200 | -2.73338800 |
| Mg | 3.37838600   | -2.89222100 | 0.07078800  |
| Cl | 2.47001400   | -2.24420900 | 2.31586900  |
| Cl | 1.32442000   | -4.30641700 | -0.19966400 |
| Mg | 0.16835700   | -2.63034200 | -1.43741100 |
| Cl | -0.79820900  | -1.88738400 | 0.75192600  |
| Cl | -1.88567700  | -4.03991000 | -1.70504400 |
| Mg | -3.10019600  | -2.27306300 | -3.00132000 |
| Cl | -4.06664100  | -1.53020600 | -0.81237300 |
| Cl | -5.15410200  | -3.68276000 | -3.26924700 |
| Cl | -7.33506600  | -1.17305600 | -2.37657600 |
| Ti | 0.41623300   | -3.65392200 | 2.04795300  |
| Cl | -1.63750400  | -5.06389400 | 1.78017400  |
| Mg | -2.85201600  | -3.29707600 | 0.48399400  |
| Cl | -4.90592200  | -4.70677200 | 0.21606700  |
| Mg | -6.12044800  | -2.93989800 | -1.08030500 |
| Cl | -7.08688700  | -2.19706900 | 1.10873800  |
| Cl | -8.17435400  | -4.34959400 | -1.34823200 |
| Mg | -9.38887300  | -2.58274700 | -2.64450800 |
| Cl | -10.35531900 | -1.83989000 | -0.45556100 |
| Cl | -11.44277900 | -3.99244400 | -2.91243500 |
| Mg | -9.14069300  | -3.60676000 | 0.84080600  |
| Cl | -11.19459900 | -5.01645600 | 0.57287900  |
| Mg | -12.40912500 | -3.24958200 | -0.72349300 |
| Cl | -14.46303100 | -4.65927800 | -0.99142000 |
| Cl | 1.71391900   | -4.13735700 | 3.82191400  |
| Cl | -0.73658400  | -4.23710500 | 3.89027200  |
| Cl | 12.95954200  | 5.62126300  | -0.39141900 |
| Cl | 9.69111700   | 5.97841300  | -1.95562200 |

|    |              |             |             |
|----|--------------|-------------|-------------|
| Mg | 10.90573500  | 4.21157200  | -0.65935200 |
| Cl | 9.93929000   | 4.95442900  | 1.52959600  |
| Cl | 8.85182900   | 2.80187500  | -0.92727800 |
| Mg | 7.63731000   | 4.56872200  | -2.22355500 |
| Cl | 6.67086400   | 5.31157900  | -0.03460700 |
| Cl | 5.58340400   | 3.15902600  | -2.49148200 |
| Cl | 3.40243900   | 5.66872900  | -1.59881000 |
| Mg | 7.88548300   | 3.54473800  | 1.26166400  |
| Cl | 5.83157700   | 2.13504100  | 0.99373700  |
| Mg | 4.61706900   | 3.90186800  | -0.30252700 |
| Cl | 3.59639700   | 4.74021300  | 1.82875700  |
| Cl | 2.56307200   | 2.49222100  | -0.57051600 |
| Mg | 1.34819600   | 4.25868200  | -1.86681500 |
| Cl | 0.38275200   | 5.00437800  | 0.32503500  |
| Cl | -0.70527300  | 2.84934100  | -2.13466900 |
| Cl | -2.88623800  | 5.35904500  | -1.24199800 |
| Mg | 1.54016700   | 3.32494800  | 1.55578300  |
| Cl | -0.51646300  | 1.91743300  | 1.29211100  |
| Mg | -1.67185600  | 3.59244400  | 0.05482000  |
| Cl | -2.63806500  | 4.33506000  | 2.24322000  |
| Cl | -3.72552500  | 2.18250700  | -0.21365400 |
| Mg | -4.94004400  | 3.94935300  | -1.50993100 |
| Cl | -5.90649000  | 4.69221100  | 0.67901700  |
| Cl | -6.99395100  | 2.53965700  | -1.77785700 |
| Cl | -9.17491500  | 5.04936100  | -0.88518600 |
| Mg | -4.69187100  | 2.92536900  | 1.97528800  |
| Cl | -6.74577800  | 1.51567200  | 1.70736100  |
| Mg | -7.96029700  | 3.28251900  | 0.41108400  |
| Cl | -8.92674200  | 4.02537600  | 2.60003200  |
| Cl | -10.01420300 | 1.87282300  | 0.14315800  |
| Mg | -11.22872200 | 3.63966900  | -1.15311900 |
| Cl | -12.19516700 | 4.38252600  | 1.03582900  |
| Cl | -13.28262800 | 2.22997300  | -1.42104500 |
| Mg | -10.98054900 | 2.61568500  | 2.33210000  |
| Cl | -13.03445500 | 1.20598800  | 2.06417300  |
| Mg | -14.24897400 | 2.97283500  | 0.76789700  |
| Cl | -16.30288000 | 1.56313800  | 0.49997000  |
| S  | 7.05743900   | -1.99994900 | 5.22650400  |
| C  | 6.04529200   | -0.45781700 | 4.90116700  |
| O  | 6.38238500   | 0.35984700  | 4.10937100  |
| C  | 8.11544300   | -2.02654300 | 3.71849000  |
| O  | 7.99156600   | -1.16967500 | 2.90793800  |
| C  | 9.03444000   | -3.23418700 | 3.56502300  |
| C  | 4.75592100   | -0.33305800 | 5.66432500  |
| C  | 8.76296100   | -4.53265400 | 4.01273300  |
| C  | 9.67202400   | -5.57082400 | 3.79519600  |
| C  | 10.87952300  | -5.33027900 | 3.14505100  |
| C  | 11.16985600  | -4.04084200 | 2.69404400  |
| C  | 10.25130500  | -3.01924000 | 2.90227300  |
| C  | 4.24563400   | -1.30461500 | 6.53002400  |
| C  | 3.00930700   | -1.10944000 | 7.14673100  |
| C  | 2.26782600   | 0.04314700  | 6.88590400  |
| C  | 2.75522200   | 0.99818700  | 5.98665700  |
| C  | 3.99193300   | 0.81067900  | 5.37308600  |
| H  | 7.83398400   | -4.73965600 | 4.51615300  |
| H  | 9.43961600   | -6.56475100 | 4.14715900  |
| H  | 11.58847700  | -6.12984000 | 2.99126500  |
| H  | 12.11725400  | -3.84795900 | 2.21021400  |

|   |             |             |            |
|---|-------------|-------------|------------|
| H | 10.47104200 | -1.99817600 | 2.61557400 |
| H | 4.80145900  | -2.20936300 | 6.72388900 |
| H | 2.62393600  | -1.85716700 | 7.82105100 |
| H | 1.31064800  | 0.18932500  | 7.36397300 |
| H | 2.18122100  | 1.88636500  | 5.76678100 |
| H | 4.35176700  | 1.50136700  | 4.62381200 |

**Diisobutyl phthalate (Mono mode)**

|    |              |             |             |
|----|--------------|-------------|-------------|
| Cl | -13.50777000 | -2.41431800 | 0.56153100  |
| Cl | -10.22318400 | -3.98546800 | 0.57739000  |
| Mg | -11.35103000 | -2.13706500 | -0.68301600 |
| Cl | -10.51275200 | -0.36875300 | 0.88146300  |
| Cl | -9.19428300  | -1.85970600 | -1.92765600 |
| Mg | -8.06653900  | -3.70811000 | -0.66715100 |
| Cl | -7.22816100  | -1.93980400 | 0.89733000  |
| Cl | -5.90969700  | -3.43085600 | -1.91179600 |
| Cl | -3.94367500  | -3.51094900 | 0.91318700  |
| Mg | -8.41888300  | -0.05021800 | 0.09814200  |
| Cl | -6.50472100  | 0.17250000  | -1.50313700 |
| Mg | -5.07152100  | -1.66254600 | -0.34721900 |
| Cl | -4.23324300  | 0.10576600  | 1.21725900  |
| Cl | -2.91467400  | -1.38519200 | -1.59185700 |
| Mg | -1.78693000  | -3.23359700 | -0.33135300 |
| Cl | -0.94865100  | -1.46528500 | 1.23312600  |
| Cl | 0.36980900   | -2.95634400 | -1.57590000 |
| Cl | 2.33594000   | -3.03633500 | 1.24899300  |
| Mg | -2.10612800  | 0.22468400  | -0.59796600 |
| Cl | -1.23821900  | 2.15143000  | 1.53719800  |
| Cl | 0.08024400   | 0.66037800  | -1.27192700 |
| Mg | 1.20808800   | -1.18803200 | -0.01142100 |
| Cl | 2.04636700   | 0.58028000  | 1.55305800  |
| Cl | 3.36483300   | -0.91068000 | -1.25596100 |
| Mg | 4.49257900   | -2.75907700 | 0.00444400  |
| Cl | 5.33085800   | -0.99076500 | 1.56892300  |
| Cl | 6.64942400   | -2.48173000 | -1.24009400 |
| Cl | 8.61544900   | -2.56181600 | 1.58478900  |
| Ti | 0.91852200   | 2.42869000  | 0.29255200  |
| Cl | 3.07526700   | 2.70604200  | -0.95198800 |
| Mg | 4.20301100   | 0.85763700  | 0.30851600  |
| Cl | 6.35985800   | 1.13499100  | -0.93612100 |
| Mg | 7.48760200   | -0.71341300 | 0.32438300  |
| Cl | 8.32588100   | 1.05489900  | 1.88886200  |
| Cl | 9.64434200   | -0.43616100 | -0.92016400 |
| Mg | 10.77218800  | -2.28456300 | 0.34024200  |
| Cl | 11.61046700  | -0.51625100 | 1.90472100  |
| Cl | 12.92893300  | -2.00721100 | -0.90429700 |
| Mg | 10.48262000  | 1.33215100  | 0.64431500  |
| Cl | 12.63936500  | 1.60950400  | -0.60022500 |
| Mg | 13.76711200  | -0.23889400 | 0.66018000  |
| Cl | 15.92395100  | 0.03835300  | -0.58436600 |
| Cl | -0.39906300  | 4.24990900  | 0.39078300  |
| Cl | 2.04863800   | 4.36146100  | 0.51525500  |
| C  | -4.32468900  | 2.53613900  | -1.51783400 |
| O  | -3.40775800  | 1.88048700  | -1.01260500 |
| C  | -6.53642700  | 2.34980800  | 1.12615800  |
| O  | -7.49198900  | 1.57004600  | 0.97317300  |
| C  | -5.04869300  | 4.84525000  | -1.46920900 |
| C  | -5.21026800  | 3.58353200  | -0.85668900 |

|   |             |             |             |
|---|-------------|-------------|-------------|
| C | -6.17908800 | 3.47649600  | 0.17660200  |
| C | -6.97226300 | 4.60164500  | 0.47894100  |
| C | -6.80181200 | 5.83160700  | -0.15481400 |
| C | -5.80599000 | 5.96128800  | -1.12086400 |
| H | -7.43908800 | 6.67635700  | 0.11349400  |
| H | -4.29927900 | 4.94777000  | -2.25267800 |
| H | -7.73713900 | 4.50418100  | 1.25268900  |
| H | -5.62418000 | 6.91567300  | -1.61835600 |
| O | -5.88099900 | 2.48576000  | 2.26218700  |
| C | -6.17508900 | 1.53673700  | 3.35406500  |
| H | -5.24983300 | 1.55602200  | 3.94268600  |
| H | -6.29705300 | 0.54322900  | 2.91205300  |
| C | -7.37687700 | 1.95358200  | 4.19294000  |
| C | -7.11859400 | 3.25899600  | 4.95139600  |
| C | -7.70671600 | 0.79123100  | 5.14176800  |
| H | -8.23321600 | 2.09474400  | 3.51146600  |
| H | -6.83060600 | 4.07624000  | 4.27439700  |
| H | -6.30758900 | 3.13345300  | 5.68589700  |
| H | -8.01765700 | 3.57155500  | 5.50074800  |
| H | -6.83294100 | 0.52377900  | 5.75799100  |
| H | -8.01461000 | -0.10714400 | 4.58727500  |
| H | -8.52570400 | 1.06607800  | 5.82103100  |
| O | -4.57707300 | 2.55575600  | -2.83169400 |
| C | -3.73636100 | 1.74870200  | -3.71705700 |
| C | -2.40551400 | 2.42364000  | -4.05021900 |
| H | -4.35839500 | 1.63145600  | -4.61338900 |
| H | -3.59739800 | 0.75895000  | -3.26512800 |
| C | -1.58263900 | 1.48909000  | -4.94617800 |
| H | -1.85666500 | 2.57472900  | -3.10581000 |
| C | -2.59934700 | 3.78821500  | -4.72222700 |
| H | -2.05948900 | 1.38274800  | -5.93323400 |
| H | -1.47077200 | 0.48592900  | -4.50928100 |
| H | -0.57590300 | 1.90251400  | -5.09748200 |
| H | -1.62691200 | 4.26523200  | -4.91327100 |
| H | -3.19339500 | 4.47700700  | -4.10562800 |
| H | -3.11696700 | 3.67459700  | -5.68838700 |

#### Diisobutyl phthalate (Chelate mode)

|    |             |             |             |
|----|-------------|-------------|-------------|
| Cl | 12.77985700 | -2.95287700 | -1.02911700 |
| Cl | 9.43434900  | -4.38975900 | -1.01460100 |
| Mg | 10.66841700 | -2.63676000 | 0.28205900  |
| Cl | 9.86397200  | -0.77861800 | -1.19354500 |
| Cl | 8.55697600  | -2.32054100 | 1.59333100  |
| Mg | 7.32300700  | -4.07354200 | 0.29657100  |
| Cl | 6.51846200  | -2.21540100 | -1.17903300 |
| Cl | 5.21146800  | -3.75742300 | 1.60784700  |
| Cl | 3.17305400  | -3.65228200 | -1.16451700 |
| Mg | 7.75263100  | -0.46239700 | 0.11772600  |
| Cl | 5.64109100  | -0.14628300 | 1.42890300  |
| Mg | 4.40712200  | -1.89928300 | 0.13214300  |
| Cl | 3.60267700  | -0.04114100 | -1.34346200 |
| Cl | 2.29558100  | -1.58306500 | 1.44341500  |
| Mg | 1.06161200  | -3.33606600 | 0.14665500  |
| Cl | 0.25716700  | -1.47792400 | -1.32894900 |
| Cl | -1.04982800 | -3.01995000 | 1.45783100  |
| Cl | -3.08834300 | -2.91470700 | -1.31443600 |
| Mg | 1.43203100  | 0.19064000  | -0.10437700 |
| Cl | 0.68679000  | 2.13321700  | -1.50789400 |



|    |              |             |             |
|----|--------------|-------------|-------------|
| Cl | -0.62020400  | 0.59119400  | 1.27898600  |
| Mg | -1.85427300  | -1.16180800 | -0.01777300 |
| Cl | -2.65871800  | 0.69633400  | -1.49337800 |
| Cl | -3.96571500  | -0.84559200 | 1.29339900  |
| Mg | -5.19968300  | -2.59858900 | -0.00326100 |
| Cl | -6.00412800  | -0.74044700 | -1.47886500 |
| Cl | -7.31122400  | -2.28237400 | 1.30791200  |
| Cl | -9.34963800  | -2.17723000 | -1.46435300 |
| Ti | -1.42464900  | 2.44933600  | -0.19661800 |
| Cl | -3.53609100  | 2.76555300  | 1.11455400  |
| Mg | -4.77006000  | 1.01255200  | -0.18220600 |
| Cl | -6.88160100  | 1.32877000  | 1.12906700  |
| Mg | -8.11557000  | -0.42423100 | -0.16769300 |
| Cl | -8.92001500  | 1.43391100  | -1.64329800 |
| Cl | -10.22701000 | -0.10811500 | 1.14348300  |
| Mg | -11.46107800 | -1.86111300 | -0.15317700 |
| Cl | -12.26552300 | -0.00297100 | -1.62878100 |
| Cl | -13.57252000 | -1.54489700 | 1.15799500  |
| Mg | -11.03145500 | 1.75002700  | -0.33212200 |
| Cl | -13.14289600 | 2.06624300  | 0.97905100  |
| Mg | -14.37686500 | 0.31324600  | -0.31761000 |
| Cl | -16.48840500 | 0.62936100  | 0.99356700  |
| Cl | -0.03650800  | 4.21884000  | -0.26327300 |
| Cl | -2.47995300  | 4.43275900  | -0.31798700 |
| C  | 9.01130800   | 3.29044000  | 0.79484500  |
| C  | 9.79530200   | 4.28984300  | 1.39744500  |
| C  | 10.31436500  | 5.35384100  | 0.65998900  |
| C  | 10.05079600  | 5.43831500  | -0.70738700 |
| C  | 9.26247300   | 4.46502200  | -1.31988500 |
| C  | 8.73573900   | 3.37884900  | -0.59812300 |
| C  | 7.88247600   | 2.39503800  | -1.33290000 |
| O  | 7.68998100   | 2.68969800  | -2.61704400 |
| C  | 6.88771200   | 1.68909100  | -3.36099700 |
| C  | 6.88666700   | 2.05451700  | -4.83551100 |
| C  | 8.62341400   | 2.16841200  | 1.71588200  |
| O  | 8.71630900   | 0.96273300  | 1.47948100  |
| O  | 8.27031600   | 2.63499100  | 2.91648900  |
| C  | 7.98151700   | 1.61900400  | 3.94437600  |
| C  | 7.59148900   | 2.33221400  | 5.23339000  |
| H  | 10.01085500  | 4.21413100  | 2.46286800  |
| H  | 10.92897700  | 6.10558200  | 1.15565400  |
| H  | 10.46026200  | 6.25585800  | -1.30156600 |
| H  | 9.05588600   | 4.52860200  | -2.38683000 |
| H  | 5.87993100   | 1.67649900  | -2.92066200 |
| H  | 7.35587200   | 0.71066300  | -3.19200800 |
| H  | 8.88946700   | 1.00825700  | 4.07503300  |
| H  | 7.17568500   | 0.98034000  | 3.55919200  |
| C  | 8.71429300   | 3.22504000  | 5.77306100  |
| C  | 7.18526200   | 1.28069900  | 6.27542600  |
| C  | 8.28863100   | 1.92895400  | -5.44341600 |
| C  | 6.23276200   | 3.41439600  | -5.10858000 |
| H  | 6.25012300   | 1.27722400  | -5.29444700 |
| H  | 6.71148700   | 2.96030400  | 5.01192700  |
| H  | 9.60691400   | 2.62444000  | 6.01420900  |
| H  | 8.39283900   | 3.72740600  | 6.69618000  |
| H  | 9.00682200   | 4.00174900  | 5.05252600  |
| H  | 6.87180100   | 1.77275700  | 7.20667100  |
| H  | 8.03264100   | 0.61993400  | 6.51751200  |

|   |            |            |             |
|---|------------|------------|-------------|
| H | 6.35207000 | 0.65376700 | 5.92799400  |
| H | 8.70286600 | 0.92526000 | -5.27066500 |
| H | 8.98576400 | 2.65779900 | -5.00420300 |
| H | 8.26274200 | 2.09929800 | -6.52822800 |
| H | 6.80534100 | 4.23625500 | -4.65368200 |
| H | 5.20804400 | 3.45202900 | -4.70734200 |
| H | 6.17954400 | 3.60187400 | -6.19005100 |
| O | 7.36438900 | 1.39663600 | -0.82629000 |

**Diisobutyl phthalate (Bridge mode)**

|    |              |             |             |
|----|--------------|-------------|-------------|
| Cl | 13.51166100  | -2.40840400 | -0.57276900 |
| Cl | 10.22740700  | -3.97996900 | -0.60630200 |
| Mg | 11.35397200  | -2.14371300 | 0.67286600  |
| Cl | 10.51645900  | -0.36040600 | -0.87491300 |
| Cl | 9.19627500   | -1.87891700 | 1.91859500  |
| Mg | 8.06981200   | -3.71517300 | 0.63932900  |
| Cl | 7.23219900   | -1.93187200 | -0.90845200 |
| Cl | 5.91202000   | -3.45048100 | 1.88506200  |
| Cl | 3.94804400   | -3.50343100 | -0.94198300 |
| Mg | 8.42196400   | -0.04992900 | -0.09003500 |
| Cl | 6.50660600   | 0.15680200  | 1.51195900  |
| Mg | 5.07461000   | -1.66717500 | 0.33718500  |
| Cl | 4.23709600   | 0.11613100  | -1.21059400 |
| Cl | 2.91681300   | -1.40238400 | 1.58291100  |
| Mg | 1.79035000   | -3.23864100 | 0.30364500  |
| Cl | 0.95283700   | -1.45533400 | -1.24413400 |
| Cl | -0.36734000  | -2.97395000 | 1.54928000  |
| Cl | -2.33142300  | -3.02679900 | -1.27767400 |
| Mg | 2.10865400   | 0.21694100  | 0.60417000  |
| Cl | 1.24188900   | 2.16422900  | -1.51274500 |
| Cl | -0.07829000  | 0.64561900  | 1.28076900  |
| Mg | -1.20485300  | -1.19064300 | 0.00150100  |
| Cl | -2.04236600  | 0.59266400  | -1.54627800 |
| Cl | -3.36254700  | -0.92585300 | 1.24713000  |
| Mg | -4.48901300  | -2.76210300 | -0.03203600 |
| Cl | -5.32652600  | -0.97879600 | -1.57981600 |
| Cl | -6.64680700  | -2.49731800 | 1.21359000  |
| Cl | -8.61078600  | -2.55026100 | -1.61335500 |
| Ti | -0.91580300  | 2.42892500  | -0.26701000 |
| Cl | -3.07349800  | 2.69371600  | 0.97861900  |
| Mg | -4.19996100  | 0.85746000  | -0.30064700 |
| Cl | -6.35775800  | 1.12225100  | 0.94507900  |
| Mg | -7.48422100  | -0.71400600 | -0.33418700 |
| Cl | -8.32173400  | 1.06930100  | -1.88196600 |
| Cl | -9.64191000  | -0.44931500 | 0.91144800  |
| Mg | -10.76847500 | -2.28557000 | -0.36772000 |
| Cl | -11.60598800 | -0.50226400 | -1.91549900 |
| Cl | -12.92617000 | -2.02078000 | 0.87790900  |
| Mg | -10.47942300 | 1.33399200  | -0.63633100 |
| Cl | -12.63711800 | 1.59878200  | 0.60929800  |
| Mg | -13.76358300 | -0.23746800 | -0.66986900 |
| Cl | -15.92137200 | 0.02721700  | 0.57576400  |
| Cl | 0.40148300   | 4.25127400  | -0.34654300 |
| Cl | -2.04615000  | 4.36355300  | -0.47168500 |
| C  | 4.32154400   | 2.50158100  | 1.56437000  |
| O  | 3.39972500   | 1.83494900  | 1.08353500  |
| C  | 6.52829200   | 2.38908500  | -1.10439400 |
| O  | 7.48878500   | 1.63535000  | -0.87872700 |

|   |            |             |             |
|---|------------|-------------|-------------|
| C | 4.90872500 | 4.83686900  | 1.47227800  |
| C | 5.14475700 | 3.58026600  | 0.87298200  |
| C | 6.07347000 | 3.52338200  | -0.19944100 |
| C | 6.72809500 | 4.71286700  | -0.58183800 |
| C | 6.48342400 | 5.93850900  | 0.03340900  |
| C | 5.54491100 | 6.00437700  | 1.06124200  |
| H | 7.01797600 | 6.82904300  | -0.29978100 |
| H | 4.19316700 | 4.88982600  | 2.29126000  |
| H | 7.45106100 | 4.66793000  | -1.39773500 |
| H | 5.31338300 | 6.95295400  | 1.54982100  |
| O | 5.93447800 | 2.49207900  | -2.27903000 |
| C | 6.29017500 | 1.53661400  | -3.34470200 |
| H | 5.37397600 | 1.49642700  | -3.94585900 |
| H | 6.45104000 | 0.55755900  | -2.88176700 |
| C | 7.48795300 | 1.98407700  | -4.17869800 |
| C | 7.27290400 | 3.35968600  | -4.81873400 |
| C | 7.73991700 | 0.90524700  | -5.24247800 |
| H | 8.36885000 | 2.02595000  | -3.51635200 |
| H | 7.09856900 | 4.14091700  | -4.06521700 |
| H | 6.40203000 | 3.34406700  | -5.49329900 |
| H | 8.15234400 | 3.64890800  | -5.41305800 |
| H | 6.88125600 | 0.81873500  | -5.92657200 |
| H | 7.91592600 | -0.08126800 | -4.78974200 |
| H | 8.62297300 | 1.16118700  | -5.84567000 |
| O | 4.60726400 | 2.52320800  | 2.87182600  |
| C | 3.79054200 | 1.70137000  | 3.76887900  |
| C | 2.46903900 | 2.38109900  | 4.13892600  |
| H | 4.43260300 | 1.57331200  | 4.65017100  |
| H | 3.64065500 | 0.72031700  | 3.30207900  |
| C | 1.58863900 | 1.38994500  | 4.91240000  |
| H | 1.95156600 | 2.64358400  | 3.20053000  |
| C | 2.69568100 | 3.66455600  | 4.94623400  |
| H | 2.06382200 | 1.09173500  | 5.85972600  |
| H | 1.38412500 | 0.47633800  | 4.33406500  |
| H | 0.62134600 | 1.85041700  | 5.15781900  |
| H | 1.74168900 | 4.18129100  | 5.12933900  |
| H | 3.36325800 | 4.36599100  | 4.42694000  |
| H | 3.14650000 | 3.43377800  | 5.92366100  |

#### Diisobutyl phthalate (Zip mode)

|    |             |             |             |
|----|-------------|-------------|-------------|
| Cl | 14.61789800 | -2.14131800 | -1.63821600 |
| Cl | 11.37266400 | -2.08978200 | -3.28827300 |
| Mg | 12.48768900 | -3.45358400 | -1.50667000 |
| Cl | 11.56747800 | -2.04158300 | 0.34729200  |
| Cl | 10.35737900 | -4.76584700 | -1.37511900 |
| Mg | 9.24245500  | -3.40204800 | -3.15672700 |
| Cl | 8.32223800  | -1.99004800 | -1.30286600 |
| Cl | 7.11214500  | -4.71431100 | -3.02517600 |
| Cl | 5.07700400  | -1.93851200 | -2.95292300 |
| Mg | 9.43726800  | -3.35384800 | 0.47883800  |
| Cl | 7.30695800  | -4.66611100 | 0.61038900  |
| Mg | 6.19202800  | -3.30231300 | -1.17132000 |
| Cl | 5.22298000  | -1.81357400 | 0.59811100  |
| Cl | 4.06171900  | -4.61457700 | -1.03976800 |
| Mg | 2.94679400  | -3.25077700 | -2.82137700 |
| Cl | 2.02657800  | -1.83877700 | -0.96751500 |
| Cl | 0.81648500  | -4.56304000 | -2.68982600 |
| Cl | -1.21865600 | -1.78724100 | -2.61757300 |

|    |              |             |             |
|----|--------------|-------------|-------------|
| Mg | 3.08962900   | -3.12776400 | 0.72985000  |
| Cl | 2.22138600   | -1.79057900 | 2.66795000  |
| Cl | 0.95719000   | -4.44137600 | 0.86153400  |
| Mg | -0.10363200  | -3.15104300 | -0.83596900 |
| Cl | -1.02384300  | -1.73904200 | 1.01799200  |
| Cl | -2.23394100  | -4.46330600 | -0.70441800 |
| Mg | -3.34886600  | -3.09950700 | -2.48602700 |
| Cl | -4.26908200  | -1.68750700 | -0.63216500 |
| Cl | -5.47917600  | -4.41177000 | -2.35447600 |
| Cl | -7.51431700  | -1.63597100 | -2.28222300 |
| Ti | 0.09117600   | -3.10284500 | 2.79949600  |
| Cl | -2.03913300  | -4.41510800 | 2.93104700  |
| Mg | -3.15405300  | -3.05130700 | 1.14953800  |
| Cl | -5.28436200  | -4.36357000 | 1.28108900  |
| Mg | -6.39929200  | -2.99977200 | -0.50061900 |
| Cl | -7.31950300  | -1.58777100 | 1.35334200  |
| Cl | -8.52960200  | -4.31203600 | -0.36906800 |
| Mg | -9.64452600  | -2.94823600 | -2.15067700 |
| Cl | -10.56474300 | -1.53623600 | -0.29681500 |
| Cl | -11.77483600 | -4.26049900 | -2.01912600 |
| Mg | -9.44971300  | -2.90003700 | 1.48488800  |
| Cl | -11.58002200 | -4.21230000 | 1.61644000  |
| Mg | -12.69495200 | -2.84850200 | -0.16526900 |
| Cl | -14.82526200 | -4.16076500 | -0.03371800 |
| Cl | 1.36173000   | -3.10545700 | 4.65657400  |
| Cl | -1.09032700  | -3.04760700 | 4.71358900  |
| Cl | 13.71392600  | 4.13200300  | -1.80014000 |
| Cl | 10.46869100  | 4.18353900  | -3.45019700 |
| Mg | 11.58371600  | 2.81973700  | -1.66859400 |
| Cl | 10.66349900  | 4.23173700  | 0.18526800  |
| Cl | 9.45340600   | 1.50747400  | -1.53704300 |
| Mg | 8.33848200   | 2.87127300  | -3.31865100 |
| Cl | 7.41826500   | 4.28327300  | -1.46479000 |
| Cl | 6.20817200   | 1.55901000  | -3.18710000 |
| Cl | 4.17303100   | 4.33481000  | -3.11484700 |
| Mg | 8.53329000   | 2.91947200  | 0.31681400  |
| Cl | 6.40298000   | 1.60720900  | 0.44836500  |
| Mg | 5.28805600   | 2.97100800  | -1.33324400 |
| Cl | 4.31900700   | 4.45974800  | 0.43618700  |
| Cl | 3.15774600   | 1.65874500  | -1.20169200 |
| Mg | 2.04282100   | 3.02254400  | -2.98330100 |
| Cl | 1.12260500   | 4.43454400  | -1.12943900 |
| Cl | -0.08748800  | 1.71028100  | -2.85175000 |
| Cl | -2.12262900  | 4.48608000  | -2.77949700 |
| Mg | 2.18565600   | 3.14555700  | 0.56792600  |
| Cl | 0.05321800   | 1.83194500  | 0.69961000  |
| Mg | -1.00760500  | 3.12227800  | -0.99789300 |
| Cl | -1.92782100  | 4.53427800  | 0.85596800  |
| Cl | -3.13791400  | 1.81001500  | -0.86634200 |
| Mg | -4.25283900  | 3.17381500  | -2.64795100 |
| Cl | -5.17305500  | 4.58581500  | -0.79408900 |
| Cl | -6.38314800  | 1.86155100  | -2.51640000 |
| Cl | -8.41828900  | 4.63735100  | -2.44414700 |
| Mg | -4.05803100  | 3.22201300  | 0.98751400  |
| Cl | -6.18834000  | 1.90975000  | 1.11906600  |
| Mg | -7.30326500  | 3.27354900  | -0.66254300 |
| Cl | -8.22348100  | 4.68554900  | 1.19131900  |
| Cl | -9.43357500  | 1.96128600  | -0.53099200 |

|    |              |             |             |
|----|--------------|-------------|-------------|
| Mg | -10.54849900 | 3.32508500  | -2.31260100 |
| Cl | -11.46871600 | 4.73708500  | -0.45873900 |
| Cl | -12.67880900 | 2.01282200  | -2.18104900 |
| Mg | -10.35369100 | 3.37328300  | 1.32286500  |
| Cl | -12.48400100 | 2.06102000  | 1.45441600  |
| Mg | -13.59892500 | 3.42482000  | -0.32719300 |
| Cl | -15.72923500 | 2.11255600  | -0.19564200 |
| C  | 3.53714700   | 2.43075800  | 6.07104400  |
| C  | 2.50970400   | 2.90507100  | 6.89529000  |
| C  | 1.78363000   | 2.02563200  | 7.70310800  |
| C  | 2.08698600   | 0.66154800  | 7.69482200  |
| C  | 3.09895000   | 0.17414300  | 6.86046100  |
| C  | 3.81820900   | 1.04523700  | 6.03188800  |
| C  | 4.76569400   | 0.50736100  | 5.00084600  |
| O  | 5.52940200   | -0.51041600 | 5.48078700  |
| C  | 6.47027700   | -1.10582000 | 4.52838100  |
| C  | 6.56305800   | -2.61999800 | 4.72475900  |
| C  | 4.43068300   | 3.41395800  | 5.38147300  |
| O  | 5.64683100   | 3.32924900  | 5.37411400  |
| O  | 3.72020000   | 4.43978500  | 4.83838100  |
| C  | 4.50991500   | 5.43652100  | 4.11553500  |
| C  | 3.87534000   | 6.81838900  | 4.24639400  |
| H  | 2.29860900   | 3.97450100  | 6.91055100  |
| H  | 0.99953500   | 2.41772200  | 8.35255700  |
| H  | 1.52426500   | -0.02586100 | 8.32719100  |
| H  | 3.32223100   | -0.89245200 | 6.83950200  |
| H  | 7.44070500   | -0.62016300 | 4.71691700  |
| H  | 6.13113700   | -0.86217000 | 3.51275700  |
| H  | 4.53900000   | 5.11066800  | 3.06339300  |
| H  | 5.53057200   | 5.41972900  | 4.51836100  |
| C  | 2.36785500   | 6.81168800  | 3.97452600  |
| C  | 4.61378100   | 7.77803200  | 3.29793900  |
| C  | 5.18232500   | -3.27973600 | 4.64284300  |
| C  | 7.33261600   | -3.04096600 | 5.98557400  |
| H  | 7.14058300   | -2.96438500 | 3.84658300  |
| H  | 4.04124900   | 7.17025600  | 5.28043100  |
| H  | 1.96955500   | 7.83738000  | 3.99849500  |
| H  | 2.14773000   | 6.39083700  | 2.98056300  |
| H  | 1.82559600   | 6.21165400  | 4.71841200  |
| H  | 4.45551100   | 7.49284600  | 2.24558300  |
| H  | 5.69858700   | 7.77534600  | 3.48642000  |
| H  | 4.25142400   | 8.81004400  | 3.42215400  |
| H  | 5.27231200   | -4.37481200 | 4.60336400  |
| H  | 4.64230800   | -2.94755400 | 3.74647600  |
| H  | 4.56476300   | -3.01984400 | 5.51457000  |
| H  | 8.31765900   | -2.54996600 | 6.04175600  |
| H  | 7.49658400   | -4.12992900 | 5.98952200  |
| H  | 6.78268100   | -2.77718400 | 6.90280000  |
| O  | 4.79386000   | 0.92152500  | 3.85341200  |

**Dibenzoyl sulfide (Reactant 1,2-sj)**

|    |              |             |             |
|----|--------------|-------------|-------------|
| C  | 7.33025800   | 2.23210600  | -0.70358900 |
| C  | 8.70869400   | 1.50828600  | 1.76407400  |
| O  | 8.35461700   | 0.34965500  | 1.55006500  |
| O  | 7.08451300   | 1.03723200  | -0.84688400 |
| Cl | -12.39808600 | -2.59087100 | 1.32462500  |
| Mg | -10.40854200 | -2.43826400 | 0.11525200  |
| Cl | -6.35334300  | -2.75201300 | 1.31292500  |

|    |              |             |             |
|----|--------------|-------------|-------------|
| Mg | -4.56890900  | -2.84920400 | -0.06220200 |
| Cl | -8.60045800  | -2.53777700 | -1.22853800 |
| Cl | -2.79209400  | -2.94558600 | -1.44739700 |
| Cl | -0.69281100  | -3.15098400 | 1.16429700  |
| Mg | 1.08395200   | -3.24726000 | -0.22086400 |
| Cl | 5.42252200   | -3.98756600 | 0.69938500  |
| Mg | 7.19932200   | -4.08394800 | -0.68580000 |
| Cl | 2.89455600   | -3.34694800 | -1.56126500 |
| Cl | 8.96177300   | -4.17904700 | -2.08127200 |
| Cl | -15.12498200 | 0.13410400  | 0.05152400  |
| Mg | -12.97515000 | -0.23929500 | 0.46582100  |
| Cl | -11.39091900 | -0.56178200 | -1.16140100 |
| Mg | -7.32871000  | -0.74131300 | 0.10061600  |
| Cl | -9.28701000  | -0.75524400 | 1.65445100  |
| Cl | -5.36050700  | -0.75930700 | -1.33125300 |
| Mg | -1.59439900  | -1.16040000 | -0.09469100 |
| Cl | -3.41025000  | -1.13066000 | 1.52230600  |
| Cl | 0.22450700   | -1.32258800 | -1.71100600 |
| Mg | 4.28594200   | -1.55812300 | -0.14501400 |
| Mg | 10.30373900  | -2.62605600 | -0.72487900 |
| Cl | 2.24026900   | -1.43875400 | 1.19802400  |
| Cl | 6.46269700   | -2.17095900 | -1.88849900 |
| Cl | 8.46574000   | -2.85945400 | 1.05763600  |
| Cl | 12.42103700  | -3.11347200 | -0.24118500 |
| Cl | -11.90437200 | 1.78885400  | 1.37076800  |
| Mg | -10.03347300 | 1.08871800  | 0.21920000  |
| Cl | -6.37388800  | 0.96765200  | 1.60422800  |
| Cl | -8.24565000  | 1.24713700  | -1.20773700 |
| Mg | -4.34811500  | 0.89049500  | 0.41745700  |
| Cl | -0.34588900  | 0.66816200  | 1.24977200  |
| Cl | -2.49282100  | 0.95831700  | -1.27585900 |
| Mg | 1.47190800   | 0.42036900  | -0.46085300 |
| Cl | 5.58534000   | -0.58724900 | 1.10051200  |
| Cl | 3.58374400   | 0.38157900  | -1.47878100 |
| Mg | 7.55571100   | -0.96512200 | -0.02341300 |
| Cl | 9.61853500   | -0.43242300 | -1.04922900 |
| Ti | -1.30934600  | 2.93001200  | -0.03744800 |
| Cl | -3.26899700  | 2.83296400  | 1.39876800  |
| Cl | 0.75694900   | 2.59471400  | -1.29859800 |
| C  | -1.81139000  | 4.25815800  | -1.52089800 |
| C  | -0.70316900  | 5.04613900  | 1.34112300  |
| H  | -2.67593400  | 4.63427700  | -0.91678600 |
| H  | -2.23624800  | 3.60925000  | -2.31266400 |
| C  | -0.98748500  | 5.40834200  | -2.13660400 |
| C  | 0.02700100   | 3.93907400  | 1.69965000  |
| H  | -0.34395500  | 5.63912600  | 0.48892200  |
| H  | -0.23404400  | 3.35768300  | 2.59202300  |
| H  | 0.99145100   | 3.72657700  | 1.22918700  |
| C  | -1.83144700  | 5.64486300  | 2.12530900  |
| H  | -2.69976900  | 5.88788800  | 1.49109900  |
| H  | -2.16213000  | 4.99348300  | 2.94693100  |
| H  | -1.47998700  | 6.59972700  | 2.55947400  |
| C  | -0.61299300  | 5.09154200  | -3.59385100 |
| C  | -1.73327100  | 6.75235400  | -2.03783400 |
| H  | -0.03323300  | 5.51392400  | -1.57859900 |
| H  | 0.03115300   | 5.88117800  | -4.01588200 |
| H  | -0.07371900  | 4.13420000  | -3.66761100 |
| H  | -1.51955400  | 5.02335200  | -4.22050400 |

|   |             |             |             |
|---|-------------|-------------|-------------|
| H | -1.12954300 | 7.57287400  | -2.46170300 |
| H | -2.68559700 | 6.71137200  | -2.59417300 |
| H | -1.96899300 | 7.01356600  | -0.99129600 |
| S | 8.42771000  | 2.89579800  | 0.60927400  |
| C | 6.79385600  | 3.26553900  | -1.62069200 |
| C | 9.45777300  | 1.88576900  | 2.98636700  |
| C | 9.66196700  | 3.22269600  | 3.39258100  |
| C | 10.38904300 | 3.49480400  | 4.55520100  |
| C | 10.91707600 | 2.44149800  | 5.31837500  |
| C | 10.71274800 | 1.10986300  | 4.92175900  |
| C | 9.98388100  | 0.82832100  | 3.76449200  |
| C | 6.11244000  | 2.80566300  | -2.77178300 |
| C | 5.58301200  | 3.72324100  | -3.68178400 |
| C | 5.72566000  | 5.10179600  | -3.45559500 |
| C | 6.39697600  | 5.56413800  | -2.31233600 |
| C | 6.92874800  | 4.65319500  | -1.39492300 |
| H | 9.23868700  | 4.04800100  | 2.81353600  |
| H | 10.54068000 | 4.53085700  | 4.86998400  |
| H | 11.48843000 | 2.65939800  | 6.22553000  |
| H | 11.12683800 | 0.28965400  | 5.51441500  |
| H | 9.81921300  | -0.20119200 | 3.43733400  |
| H | 6.00790300  | 1.73002500  | -2.92951200 |
| H | 5.05778000  | 3.36213500  | -4.57012500 |
| H | 5.31175100  | 5.81861700  | -4.17111300 |
| H | 6.50271900  | 6.63772200  | -2.13374700 |
| H | 7.43471100  | 5.02314100  | -0.49897900 |

**Dibenzoyl sulfide (TS 1,2-si)**

|    |              |             |             |
|----|--------------|-------------|-------------|
| C  | 7.33913500   | 2.21055500  | -0.74544900 |
| C  | 8.70448300   | 1.51506700  | 1.73772200  |
| O  | 8.35131800   | 0.35414300  | 1.53540300  |
| O  | 7.08442500   | 1.01537400  | -0.86911700 |
| Cl | -12.40101500 | -2.58460300 | 1.33991300  |
| Mg | -10.41131200 | -2.44563200 | 0.12915700  |
| Cl | -6.35631100  | -2.74735300 | 1.33058300  |
| Mg | -4.57175100  | -2.85991600 | -0.04323300 |
| Cl | -8.60311900  | -2.56018200 | -1.21328700 |
| Cl | -2.79483600  | -2.97177700 | -1.42710700 |
| Cl | -0.69586100  | -3.14931100 | 1.18687600  |
| Mg | 1.08105300   | -3.26107200 | -0.19700000 |
| Cl | 5.41930900   | -3.99240200 | 0.73170600  |
| Mg | 7.19622300   | -4.10426300 | -0.65216800 |
| Cl | 2.89172700   | -3.37575500 | -1.53602800 |
| Cl | 8.95879000   | -4.21495000 | -2.04634400 |
| Cl | -15.12710900 | 0.12705500  | 0.03700800  |
| Mg | -12.97741100 | -0.24235200 | 0.45555600  |
| Cl | -11.39309700 | -0.58288600 | -1.16790400 |
| Mg | -7.33105700  | -0.74970300 | 0.09640600  |
| Cl | -9.28951700  | -0.74626900 | 1.65009900  |
| Cl | -5.36266500  | -0.78374800 | -1.33499800 |
| Mg | -1.59696700  | -1.17227300 | -0.09364600 |
| Cl | -3.41284200  | -1.12455600 | 1.52262100  |
| Cl | 0.22219700   | -1.35246700 | -1.70806900 |
| Mg | 4.28343000   | -1.57197000 | -0.13913100 |
| Mg | 10.30100500  | -2.64764700 | -0.70676300 |
| Cl | 2.23786200   | -1.43750900 | 1.20223500  |
| Cl | 6.46019200   | -2.20427000 | -1.87565100 |
| Cl | 8.46277100   | -2.86121600 | 1.07799400  |

|    |              |             |             |
|----|--------------|-------------|-------------|
| Cl | 12.41813400  | -3.13030300 | -0.21758600 |
| Cl | -11.90622000 | 1.79524300  | 1.33852900  |
| Mg | -10.03538000 | 1.08217800  | 0.19482600  |
| Cl | -6.37596100  | 0.97524800  | 1.58146800  |
| Cl | -8.24737600  | 1.22464700  | -1.23356500 |
| Mg | -4.35023300  | 0.88484000  | 0.39587400  |
| Cl | -0.34771000  | 0.67047700  | 1.23097800  |
| Cl | -2.49428500  | 0.93367600  | -1.29820000 |
| Mg | 1.46920400   | 0.40339500  | -0.47661200 |
| Cl | 5.58292900   | -0.58796900 | 1.09589100  |
| Cl | 3.58183900   | 0.35334300  | -1.49396500 |
| Mg | 7.55331900   | -0.97851400 | -0.02366200 |
| Cl | 9.61637700   | -0.45749800 | -1.05499300 |
| Ti | -1.24244500  | 2.83663800  | 0.00577700  |
| Cl | -3.36269500  | 2.89719800  | 1.28845800  |
| Cl | 0.69711500   | 2.52985300  | -1.42033600 |
| C  | -1.71792500  | 4.70909800  | -0.89448500 |
| C  | -0.51059000  | 5.02257200  | 1.09426000  |
| H  | -2.61115200  | 5.22808600  | -0.50676100 |
| H  | -2.13342900  | 3.77837000  | -1.41813500 |
| C  | -0.97321300  | 5.54380800  | -1.94427900 |
| C  | -0.13404500  | 3.79946000  | 1.66860800  |
| H  | 0.21136700   | 5.49486400  | 0.41860200  |
| H  | -0.63680200  | 3.44361000  | 2.57540600  |
| H  | 0.87042200   | 3.40797400  | 1.47520300  |
| C  | -1.50689000  | 5.92967200  | 1.76967600  |
| H  | -1.94126400  | 6.67900700  | 1.09368000  |
| H  | -2.31856600  | 5.35767100  | 2.24383700  |
| H  | -0.96980100  | 6.47419100  | 2.56785400  |
| C  | -1.58116000  | 5.28475300  | -3.34070000 |
| C  | -0.99844200  | 7.04942200  | -1.62958600 |
| H  | 0.08077600   | 5.20779200  | -1.98142700 |
| H  | -1.05422900  | 5.87823900  | -4.10649100 |
| H  | -1.49997200  | 4.22177600  | -3.62202100 |
| H  | -2.64726200  | 5.56985200  | -3.36809300 |
| H  | -0.47617400  | 7.61305400  | -2.41987600 |
| H  | -2.03639600  | 7.42388500  | -1.58389600 |
| H  | -0.50797100  | 7.29635500  | -0.67433900 |
| S  | 8.43132400   | 2.88872200  | 0.56405400  |
| C  | 6.81606600   | 3.23161200  | -1.68431400 |
| C  | 9.44557800   | 1.90721100  | 2.96020100  |
| C  | 9.65076400   | 3.24898400  | 3.34964600  |
| C  | 10.36963400  | 3.53486100  | 4.51405500  |
| C  | 10.88833300  | 2.49058500  | 5.29580600  |
| C  | 10.68301100  | 1.15424100  | 4.91588200  |
| C  | 9.96245900   | 0.85900600  | 3.75682900  |
| C  | 6.12143000   | 2.75636200  | -2.82111600 |
| C  | 5.60464400   | 3.66096200  | -3.75121400 |
| C  | 5.77401400   | 5.04174300  | -3.55990600 |
| C  | 6.45904700   | 5.51949900  | -2.43119100 |
| C  | 6.97760400   | 4.62164600  | -1.49351200 |
| H  | 9.23466800   | 4.06760700  | 2.75609900  |
| H  | 10.52209700  | 4.57468500  | 4.81572300  |
| H  | 11.45316600  | 2.71923600  | 6.20439200  |
| H  | 11.08978900  | 0.34101700  | 5.52304100  |
| H  | 9.79717100   | -0.17443100 | 3.44260000  |
| H  | 5.99646400   | 1.67932400  | -2.95205800 |
| H  | 5.06888800   | 3.28775800  | -4.62821100 |



|   |            |            |             |
|---|------------|------------|-------------|
| H | 5.37088000 | 5.74833700 | -4.29159600 |
| H | 6.58659300 | 6.59495700 | -2.28015300 |
| H | 7.49572300 | 5.00439200 | -0.60996400 |

**Dibenzoyl sulfide (Reactant 1,2-re)**

|    |              |             |             |
|----|--------------|-------------|-------------|
| Cl | -12.10095700 | -2.16998300 | 1.82406500  |
| Mg | -10.38233400 | -2.33874500 | 0.37403700  |
| Cl | -6.32643900  | -2.72811300 | 1.44626700  |
| Mg | -4.60355100  | -2.92582500 | 0.00497500  |
| Cl | -8.63863900  | -2.50955100 | -1.04568500 |
| Cl | -2.88857400  | -3.12295400 | -1.44589300 |
| Cl | -0.69061700  | -3.30151700 | 1.08519200  |
| Mg | 1.02432200   | -3.49854100 | -0.36564600 |
| Cl | 5.51306000   | -3.76705400 | 0.94312300  |
| Mg | 7.22787400   | -3.96418100 | -0.50769700 |
| Cl | 2.77467800   | -3.69852500 | -1.77323300 |
| Cl | 8.92809200   | -4.15995600 | -1.96846400 |
| Cl | -15.04799900 | 0.32420500  | 0.45014900  |
| Mg | -12.88908800 | -0.08070900 | 0.77857900  |
| Cl | -11.38593600 | -0.47747000 | -0.90821500 |
| Mg | -7.29323400  | -0.73101400 | 0.20313500  |
| Cl | -9.18436600  | -0.63158700 | 1.83361800  |
| Cl | -5.38948000  | -0.85902200 | -1.30496500 |
| Mg | -1.58513700  | -1.32915200 | -0.20792500 |
| Cl | -3.33200500  | -1.18527900 | 1.47762900  |
| Cl | 0.16023900   | -1.60258500 | -1.88929400 |
| Mg | 4.27696600   | -1.90208000 | -0.47401300 |
| Mg | 10.37024800  | -2.60678500 | -0.72028900 |
| Cl | 2.28834700   | -1.67237000 | 0.93689900  |
| Cl | 6.48520900   | -1.92483700 | -1.75902800 |
| Cl | 8.60091100   | -2.72335800 | 1.14204000  |
| Cl | 12.49031700  | -3.14403100 | -0.30499400 |
| Cl | -11.73832400 | 1.97695300  | 1.56399400  |
| Mg | -9.93714100  | 1.18176000  | 0.36320600  |
| Cl | -6.23045100  | 1.00646100  | 1.59953800  |
| Cl | -8.20846300  | 1.23624800  | -1.14232100 |
| Mg | -4.25570300  | 0.82333800  | 0.33864900  |
| Cl | -0.22858600  | 0.51527000  | 1.00947800  |
| Cl | -2.47821200  | 0.76698400  | -1.43456400 |
| Mg | 1.50754700   | 0.14843900  | -0.76097200 |
| Cl | 5.79500800   | -0.15624400 | 1.20867300  |
| Cl | 3.58208500   | 0.01441800  | -1.84609100 |
| Mg | 7.68847800   | -0.69592900 | 0.01995500  |
| Cl | 9.72638800   | -0.33615300 | -1.07432600 |
| Ti | -1.21361300  | 2.75204900  | -0.39424000 |
| Cl | -3.06649900  | 2.79487000  | 1.16862100  |
| Cl | 0.86291000   | 2.33277800  | -1.64077400 |
| C  | -1.78062100  | 3.89541400  | -2.02858500 |
| C  | -0.53960700  | 4.98126300  | 0.87688100  |
| H  | -1.08809100  | 4.74812000  | -2.17310100 |
| H  | -1.55791200  | 3.18342000  | -2.85026800 |
| C  | -3.25917600  | 4.34121900  | -2.11431800 |
| C  | 0.16021800   | 3.85525500  | 1.22978600  |
| C  | 0.00626200   | 6.07519800  | 0.01066300  |
| H  | -0.20853300  | 3.19895300  | 2.02800000  |
| H  | 1.18875700   | 3.69695500  | 0.89071500  |
| H  | -1.51061600  | 5.16573300  | 1.35463700  |
| C  | -3.55955000  | 5.57832600  | -1.25608200 |

|   |             |            |             |
|---|-------------|------------|-------------|
| C | -3.64855100 | 4.59558300 | -3.58542900 |
| H | -3.90101200 | 3.51300400 | -1.75008800 |
| H | -4.62267800 | 5.86065300 | -1.33243000 |
| H | -3.33811100 | 5.40296300 | -0.19131800 |
| H | -2.96422900 | 6.44382000 | -1.59871300 |
| H | -4.70767800 | 4.89557700 | -3.66549500 |
| H | -3.03218000 | 5.40375500 | -4.01618600 |
| H | -3.50217500 | 3.69341800 | -4.20111600 |
| H | 0.34194300  | 6.90249200 | 0.66433400  |
| H | 0.87193000  | 5.74089500 | -0.58205900 |
| H | -0.75832900 | 6.49486200 | -0.66027000 |
| C | 8.82191400  | 1.74299600 | 1.87513200  |
| C | 7.35153900  | 2.51236300 | -0.53741500 |
| O | 7.32255800  | 1.32535400 | -0.84713600 |
| O | 8.67998800  | 0.57368800 | 1.52792400  |
| S | 8.02593700  | 3.16269800 | 1.03589700  |
| C | 9.62403100  | 2.11804000 | 3.06544300  |
| C | 6.76591600  | 3.56899000 | -1.39993300 |
| C | 10.02719200 | 1.06658900 | 3.92075800  |
| C | 10.78569600 | 1.34530300 | 5.05944800  |
| C | 11.15323000 | 2.66842100 | 5.35415200  |
| C | 10.76238900 | 3.71523000 | 4.50478300  |
| C | 10.00108700 | 3.44545900 | 3.36334900  |
| C | 7.11887000  | 4.93230300 | -1.30337900 |
| C | 6.52231700  | 5.86813600 | -2.15478300 |
| C | 5.56883000  | 5.45464700 | -3.09854400 |
| C | 5.21631000  | 4.09882000 | -3.19866400 |
| C | 5.81525800  | 3.15453200 | -2.36070600 |
| H | 9.73109500  | 0.04396500 | 3.67438200  |
| H | 11.09303700 | 0.52944900 | 5.71942600  |
| H | 11.74997100 | 2.88385100 | 6.24546800  |
| H | 11.05887800 | 4.74370400 | 4.72827300  |
| H | 9.71944900  | 4.26335300 | 2.69458600  |
| H | 7.87763200  | 5.25601100 | -0.58556900 |
| H | 6.80884600  | 6.92140200 | -2.08824500 |
| H | 5.10445000  | 6.19048600 | -3.76204500 |
| H | 4.47287500  | 3.77489100 | -3.93247500 |
| H | 5.54570600  | 2.09710300 | -2.41955200 |

#### Dibenzoyl sulfide (TS 1,2-re)

|    |              |             |             |
|----|--------------|-------------|-------------|
| Cl | -12.13773900 | -2.14453600 | 1.80181700  |
| Mg | -10.41566000 | -2.34346400 | 0.35973600  |
| Cl | -6.36309200  | -2.71791400 | 1.44971000  |
| Mg | -4.63677700  | -2.94562700 | 0.01690500  |
| Cl | -8.66859000  | -2.54389000 | -1.05194100 |
| Cl | -2.91841800  | -3.17292600 | -1.42545900 |
| Cl | -0.72720200  | -3.30604800 | 1.11425400  |
| Mg | 0.99115500   | -3.53324400 | -0.32810500 |
| Cl | 5.47613200   | -3.78293600 | 0.99717000  |
| Mg | 7.19436300   | -4.01023400 | -0.44516900 |
| Cl | 2.74481000   | -3.76261800 | -1.72707100 |
| Cl | 8.89802600   | -4.23635000 | -1.89751800 |
| Cl | -15.07762800 | 0.32700800  | 0.37275900  |
| Mg | -12.92015500 | -0.07457200 | 0.71446500  |
| Cl | -11.41327200 | -0.50569000 | -0.96052700 |
| Mg | -7.32378600  | -0.74366900 | 0.16607000  |
| Cl | -9.21894900  | -0.61033800 | 1.78943800  |
| Cl | -5.41616300  | -0.90330300 | -1.33443300 |

|    |              |             |             |
|----|--------------|-------------|-------------|
| Mg | -1.61566300  | -1.35753000 | -0.21862800 |
| Cl | -3.36649700  | -1.17897800 | 1.45922100  |
| Cl | 0.13371800   | -1.66560700 | -1.89004000 |
| Mg | 4.24637900   | -1.94372400 | -0.45862500 |
| Mg | 10.33924100  | -2.66157600 | -0.67560100 |
| Cl | 2.25448600   | -1.68423700 | 0.94247900  |
| Cl | 6.45786800   | -1.99419800 | -1.73725400 |
| Cl | 8.56497900   | -2.73995900 | 1.18403900  |
| Cl | 12.45745700  | -3.19374400 | -0.24461100 |
| Cl | -11.76841300 | 1.99614300  | 1.46329100  |
| Mg | -9.96532200  | 1.17555900  | 0.28261700  |
| Cl | -6.26205500  | 1.01875300  | 1.53167900  |
| Cl | -8.23272200  | 1.19876200  | -1.21920300 |
| Mg | -4.28493100  | 0.80902000  | 0.27977900  |
| Cl | -0.25908300  | 0.50786100  | 0.96674900  |
| Cl | -2.50227900  | 0.71591900  | -1.48780600 |
| Mg | 1.48058900   | 0.10475100  | -0.79203300 |
| Cl | 5.76265100   | -0.16810000 | 1.19422900  |
| Cl | 3.55780500   | -0.05288400 | -1.86894300 |
| Mg | 7.65836700   | -0.73312400 | 0.02096700  |
| Cl | 9.69959100   | -0.39724100 | -1.07473300 |
| Ti | -1.13372900  | 2.62955000  | -0.34842600 |
| Cl | -3.18894500  | 2.82086900  | 1.04238500  |
| Cl | 0.73227000   | 2.19176900  | -1.83409300 |
| C  | -1.57335000  | 4.45868800  | -1.34971300 |
| C  | -0.22163000  | 4.83369600  | 0.52338400  |
| H  | -0.80925800  | 4.79377000  | -2.07272800 |
| H  | -2.01658400  | 3.50754400  | -1.81051100 |
| C  | -2.71864700  | 5.46966700  | -1.21249900 |
| C  | 0.03878300   | 3.65080200  | 1.23162200  |
| C  | 0.88637300   | 5.55313900  | -0.20414800 |
| H  | -0.57007300  | 3.38715000  | 2.10346100  |
| H  | 1.04256400   | 3.21325300  | 1.18343200  |
| H  | -1.07621600  | 5.43507900  | 0.85273300  |
| C  | -2.23710800  | 6.93002900  | -1.24918700 |
| C  | -3.75396500  | 5.23219600  | -2.33487300 |
| H  | -3.23399200  | 5.28612000  | -0.25077000 |
| H  | -3.09825300  | 7.61525000  | -1.18864700 |
| H  | -1.56293500  | 7.18181300  | -0.41527500 |
| H  | -1.70577400  | 7.14562500  | -2.19332300 |
| H  | -4.58957900  | 5.94584300  | -2.24340300 |
| H  | -3.29927400  | 5.36870300  | -3.33145200 |
| H  | -4.17482900  | 4.21381800  | -2.28804200 |
| H  | 1.46031800   | 6.12562200  | 0.54728400  |
| H  | 1.57863400   | 4.84396200  | -0.68391200 |
| H  | 0.52363700   | 6.26673600  | -0.95663900 |
| C  | 8.78110500   | 1.74041000  | 1.83589200  |
| C  | 7.32236500   | 2.46450100  | -0.59745600 |
| O  | 7.29742100   | 1.27212300  | -0.88631300 |
| O  | 8.64573600   | 0.56522300  | 1.50668200  |
| S  | 7.98345200   | 3.14323600  | 0.96916600  |
| C  | 9.57534000   | 2.13800300  | 3.02393600  |
| C  | 6.74259100   | 3.50425000  | -1.48464000 |
| C  | 9.97821300   | 1.10185500  | 3.89792100  |
| C  | 10.72904400  | 1.40172400  | 5.03629200  |
| C  | 11.08914100  | 2.73092600  | 5.31219900  |
| C  | 10.69862500  | 3.76256300  | 4.44430100  |
| C  | 9.94499700   | 3.47161500  | 3.30296500  |

|   |             |            |             |
|---|-------------|------------|-------------|
| C | 7.08378800  | 4.87151800 | -1.40318400 |
| C | 6.49421100  | 5.79004000 | -2.27803800 |
| C | 5.55983500  | 5.35522200 | -3.23127800 |
| C | 5.21922800  | 3.99528600 | -3.31678200 |
| C | 5.81088200  | 3.06838500 | -2.45451900 |
| H | 9.68786600  | 0.07418900 | 3.66612900  |
| H | 11.03610900 | 0.59771100 | 5.71075500  |
| H | 11.67984700 | 2.96298500 | 6.20335500  |
| H | 10.98941700 | 4.79569400 | 4.65330700  |
| H | 9.66366400  | 4.27763400 | 2.61980700  |
| H | 7.82831600  | 5.21194100 | -0.67824700 |
| H | 6.77190500  | 6.84632000 | -2.22271400 |
| H | 5.10182100  | 6.07738200 | -3.91397600 |
| H | 4.49186200  | 3.65439800 | -4.05902500 |
| H | 5.55113400  | 2.00797000 | -2.50249900 |

**Dibenzoyl sulfide (Reactant 2,1-sj)**

|    |              |             |             |
|----|--------------|-------------|-------------|
| C  | 7.30541000   | 2.23661400  | -0.67878600 |
| C  | 8.69262900   | 1.47055400  | 1.77115100  |
| O  | 8.32341400   | 0.31852400  | 1.54702700  |
| O  | 7.05042000   | 1.04554100  | -0.83724800 |
| Cl | -12.44111600 | -2.54340600 | 1.30930800  |
| Mg | -10.45274200 | -2.38017600 | 0.09945500  |
| Cl | -6.39703200  | -2.72646000 | 1.28637500  |
| Mg | -4.61496200  | -2.80976600 | -0.09264900 |
| Cl | -8.64693200  | -2.46646500 | -1.24837100 |
| Cl | -2.84040400  | -2.89218900 | -1.48174300 |
| Cl | -0.73826600  | -3.14378100 | 1.12355900  |
| Mg | 1.03629200   | -3.22610400 | -0.26553200 |
| Cl | 5.37332000   | -3.99571500 | 0.63732400  |
| Mg | 7.14777700   | -4.07813700 | -0.75176900 |
| Cl | 2.84450700   | -3.31259000 | -1.60986500 |
| Cl | 8.90792500   | -4.15904900 | -2.15100700 |
| Cl | -15.15980000 | 0.21005700  | 0.08061300  |
| Mg | -13.01076600 | -0.17735800 | 0.48623900  |
| Cl | -11.43004800 | -0.48150700 | -1.14793400 |
| Mg | -7.36678000  | -0.69447300 | 0.10531400  |
| Cl | -9.32286000  | -0.72425000 | 1.66165500  |
| Cl | -5.40062600  | -0.69845300 | -1.32956700 |
| Mg | -1.63445400  | -1.13155000 | -0.10443200 |
| Cl | -3.44768900  | -1.11913100 | 1.51530100  |
| Cl | 0.18172700   | -1.27648200 | -1.72586700 |
| Mg | 4.24446300   | -1.54993800 | -0.16936800 |
| Mg | 10.25748300  | -2.63107700 | -0.77387300 |
| Cl | 2.20142100   | -1.44291800 | 1.17813900  |
| Cl | 6.41650800   | -2.14490300 | -1.92501100 |
| Cl | 8.42120000   | -2.88411600 | 1.00774200  |
| Cl | 12.37363200  | -3.13335500 | -0.30052100 |
| Cl | -11.93126400 | 1.83328300  | 1.41940000  |
| Mg | -10.06461800 | 1.14348500  | 0.25487300  |
| Cl | -6.40356200  | 0.98853000  | 1.63264300  |
| Cl | -8.27825200  | 1.31638000  | -1.17220500 |
| Mg | -4.37983900  | 0.92167100  | 0.44194600  |
| Cl | -0.37687100  | 0.67242700  | 1.26501100  |
| Cl | -2.52628800  | 1.00767900  | -1.25324800 |
| Mg | 1.43657600   | 0.44302000  | -0.45171700 |
| Cl | 5.54916200   | -0.60234600 | 1.08841200  |
| Cl | 3.54748400   | 0.41184000  | -1.47337200 |

|    |             |             |             |
|----|-------------|-------------|-------------|
| Mg | 7.51655100  | -0.97070900 | -0.04391300 |
| Cl | 9.57990400  | -0.43045600 | -1.06474800 |
| Ti | -1.31628900 | 2.95237400  | -0.00884400 |
| Cl | -3.28482400 | 2.83799100  | 1.45968500  |
| Cl | 0.75604900  | 2.65180900  | -1.22235500 |
| C  | -1.82707400 | 4.25027600  | -1.51028900 |
| C  | -0.78047800 | 4.89038000  | 1.32307400  |
| H  | -2.70123400 | 4.57985100  | -0.88914400 |
| H  | -2.23404400 | 3.61541000  | -2.32121600 |
| C  | -1.03880900 | 5.44408300  | -2.08254700 |
| C  | -0.04481300 | 3.93537400  | 1.98389300  |
| H  | -0.29062300 | 5.58059800  | 0.62684200  |
| H  | -0.55719000 | 3.31737700  | 2.73561500  |
| C  | 1.44592600  | 3.79747200  | 1.91725500  |
| C  | -0.61097400 | 5.16866800  | -3.53337500 |
| C  | -1.84563300 | 6.75238400  | -1.98131500 |
| H  | -0.10835000 | 5.58149700  | -1.49343800 |
| H  | 0.00962700  | 5.99241800  | -3.92440600 |
| H  | -0.02930200 | 4.23639300  | -3.60884100 |
| H  | -1.49608600 | 5.07300500  | -4.18660400 |
| H  | -1.26820500 | 7.60539300  | -2.37708400 |
| H  | -2.78143000 | 6.67975700  | -2.56191100 |
| H  | -2.11644700 | 6.98347900  | -0.93653200 |
| S  | 8.41858200  | 2.87398600  | 0.63389200  |
| C  | 6.76931700  | 3.28667000  | -1.57694000 |
| C  | 9.45572400  | 1.82594200  | 2.99122300  |
| C  | 9.67715400  | 3.15588800  | 3.41121800  |
| C  | 10.41781700 | 3.40691400  | 4.56996500  |
| C  | 10.94247100 | 2.33934500  | 5.31551400  |
| C  | 10.72105200 | 1.01460300  | 4.90521200  |
| C  | 9.97845100  | 0.75407100  | 3.75177500  |
| C  | 6.08159600  | 2.84822400  | -2.73270500 |
| C  | 5.55256600  | 3.78253400  | -3.62578400 |
| C  | 5.70168300  | 5.15670300  | -3.37789400 |
| C  | 6.37913200  | 5.59778300  | -2.22980900 |
| C  | 6.91072900  | 4.66999100  | -1.32931300 |
| H  | 9.25702600  | 3.99218100  | 2.84578100  |
| H  | 10.58303100 | 4.43757300  | 4.89543000  |
| H  | 11.52469500 | 2.54074100  | 6.21955800  |
| H  | 11.13273000 | 0.18337300  | 5.48402000  |
| H  | 9.80075400  | -0.26978000 | 3.41384700  |
| H  | 5.97241400  | 1.77569800  | -2.90765100 |
| H  | 5.02285200  | 3.43798200  | -4.51803100 |
| H  | 5.28822500  | 5.88665100  | -4.08026300 |
| H  | 6.49008800  | 6.66792500  | -2.03449000 |
| H  | 7.42182800  | 5.02328400  | -0.42956100 |
| H  | -1.80718700 | 5.12553800  | 1.61841400  |
| H  | 1.87434300  | 4.23130000  | 2.84069400  |
| H  | 1.76348700  | 2.74286800  | 1.89523200  |
| H  | 1.87729900  | 4.32628100  | 1.05477100  |

**Dibenzoyl sulfide (TS 2,1-si)**

|    |              |             |             |
|----|--------------|-------------|-------------|
| C  | 7.31297700   | 2.21810900  | -0.73906900 |
| C  | 8.68934300   | 1.50120000  | 1.73161000  |
| O  | 8.32553600   | 0.34409200  | 1.52605200  |
| O  | 7.05582800   | 1.02442100  | -0.87218100 |
| Cl | -12.43630700 | -2.53290800 | 1.33387300  |
| Mg | -10.44746700 | -2.39192000 | 0.12199000  |

|    |              |             |             |
|----|--------------|-------------|-------------|
| Cl | -6.39212100  | -2.71325800 | 1.31714000  |
| Mg | -4.60938400  | -2.82211600 | -0.05924000 |
| Cl | -8.64100300  | -2.50314900 | -1.22312900 |
| Cl | -2.83415500  | -2.93028800 | -1.44570700 |
| Cl | -0.73307100  | -3.13071700 | 1.16487800  |
| Mg | 1.04215800   | -3.23878900 | -0.22158900 |
| Cl | 5.37916500   | -3.98868700 | 0.69780500  |
| Mg | 7.15429300   | -4.09685800 | -0.68866200 |
| Cl | 2.85102500   | -3.35014700 | -1.56321100 |
| Cl | 8.91511500   | -4.20372200 | -2.08530700 |
| Cl | -15.15582600 | 0.19505100  | 0.05131800  |
| Mg | -13.00678100 | -0.18339700 | 0.46526200  |
| Cl | -11.42516800 | -0.51806000 | -1.16206700 |
| Mg | -7.36236200  | -0.70482700 | 0.09684200  |
| Cl | -9.31913100  | -0.70571600 | 1.65260000  |
| Cl | -5.39555600  | -0.73535200 | -1.33682600 |
| Mg | -1.62972100  | -1.14290200 | -0.10192900 |
| Cl | -3.44369600  | -1.10031100 | 1.51646200  |
| Cl | 0.18726800   | -1.31801200 | -1.71947600 |
| Mg | 4.24943600   | -1.55943500 | -0.15621100 |
| Mg | 10.26327600  | -2.64889000 | -0.73717400 |
| Cl | 2.20573000   | -1.42760700 | 1.18808600  |
| Cl | 6.42257700   | -2.18688900 | -1.89914000 |
| Cl | 8.42631400   | -2.86861100 | 1.04815700  |
| Cl | 12.37946400  | -3.14089500 | -0.25332500 |
| Cl | -11.92871900 | 1.84535000  | 1.36011500  |
| Mg | -10.06119700 | 1.13427500  | 0.20987800  |
| Cl | -6.40068800  | 1.00769300  | 1.59199400  |
| Cl | -8.27427200  | 1.28065100  | -1.21946500 |
| Mg | -4.37639200  | 0.91902000  | 0.40369800  |
| Cl | -0.37367100  | 0.68768900  | 1.23317300  |
| Cl | -2.52211600  | 0.97341000  | -1.29201300 |
| Mg | 1.44066900   | 0.42628800  | -0.47802800 |
| Cl | 5.55308500   | -0.58719100 | 1.08371700  |
| Cl | 3.55205600   | 0.37657900  | -1.49796000 |
| Mg | 7.52117300   | -0.97622000 | -0.04045200 |
| Cl | 9.58471500   | -0.45461000 | -1.07055900 |
| Ti | -1.24297000  | 2.85452100  | 0.01741600  |
| Cl | -3.36091900  | 2.90320500  | 1.32979600  |
| Cl | 0.65906900   | 2.54241200  | -1.44351500 |
| C  | -1.75782900  | 4.71777500  | -0.85752000 |
| C  | -0.70047900  | 4.97974700  | 1.16539800  |
| H  | -2.69550000  | 5.17701800  | -0.49998500 |
| H  | -2.08912600  | 3.78481600  | -1.43707400 |
| C  | -0.99220800  | 5.63888900  | -1.81574100 |
| C  | -0.14676100  | 3.85275500  | 1.77837800  |
| H  | -0.04267200  | 5.67246100  | 0.63249900  |
| H  | -0.73786700  | 3.37568400  | 2.57264600  |
| C  | 1.34912500   | 3.61179100  | 1.80462200  |
| C  | -1.42367000  | 5.35824800  | -3.27166600 |
| C  | -1.20456500  | 7.12372400  | -1.47393400 |
| H  | 0.08735600   | 5.40365600  | -1.74553300 |
| H  | -0.88324700  | 6.02134300  | -3.96772200 |
| H  | -1.20729300  | 4.31614300  | -3.55891200 |
| H  | -2.50428000  | 5.53838500  | -3.40638500 |
| H  | -0.62241500  | 7.76436300  | -2.15618100 |
| H  | -2.26866400  | 7.39724400  | -1.58307200 |
| H  | -0.90097500  | 7.37308700  | -0.44429800 |

|   |             |             |             |
|---|-------------|-------------|-------------|
| S | 8.41827900  | 2.88253000  | 0.56637700  |
| C | 6.78365200  | 3.24869400  | -1.66384400 |
| C | 9.44202300  | 1.88166000  | 2.95057200  |
| C | 9.66163800  | 3.21995800  | 3.34418300  |
| C | 10.39162100 | 3.49464400  | 4.50434000  |
| C | 10.90711400 | 2.44255600  | 5.27772800  |
| C | 10.68746200 | 1.10966100  | 4.89371200  |
| C | 9.95579900  | 0.82560000  | 3.73884900  |
| C | 6.09057300  | 2.78514700  | -2.80645500 |
| C | 5.56752600  | 3.69950300  | -3.72345000 |
| C | 5.72867600  | 5.07851500  | -3.51294300 |
| C | 6.41185100  | 5.54461000  | -2.37822000 |
| C | 6.93699400  | 4.63689800  | -1.45373900 |
| H | 9.24844600  | 4.04470100  | 2.75710200  |
| H | 10.55546300 | 4.53180400  | 4.80919100  |
| H | 11.48075200 | 2.66243200  | 6.18295400  |
| H | 11.09188500 | 0.29039300  | 5.49427700  |
| H | 9.77953100  | -0.20501800 | 3.42135500  |
| H | 5.97211000  | 1.70928800  | -2.95235100 |
| H | 5.03338000  | 3.33537400  | -4.60522800 |
| H | 5.32060900  | 5.79278900  | -4.23436400 |
| H | 6.53276500  | 6.61862100  | -2.21217400 |
| H | 7.45312100  | 5.01014100  | -0.56497800 |
| H | -1.65206600 | 5.38424700  | 1.51800500  |
| H | 1.78254900  | 4.13036700  | 2.67970500  |
| H | 1.59871000  | 2.54512700  | 1.91748900  |
| H | 1.84599200  | 3.99819300  | 0.90138900  |

**Dibenzoyl sulfide (Reactant 2,1-re)**

|    |              |             |             |
|----|--------------|-------------|-------------|
| C  | 7.31728400   | 2.24823900  | -0.70638500 |
| C  | 8.70343200   | 1.50755800  | 1.75197100  |
| O  | 8.34131800   | 0.35173600  | 1.53558000  |
| O  | 7.06891600   | 1.05468800  | -0.85639300 |
| Cl | -12.41781400 | -2.54519900 | 1.31130300  |
| Mg | -10.42901000 | -2.38938900 | 0.10117800  |
| Cl | -6.37343400  | -2.71880100 | 1.29334700  |
| Mg | -4.59047300  | -2.81133000 | -0.08388300 |
| Cl | -8.62229400  | -2.48458900 | -1.24483200 |
| Cl | -2.81495300  | -2.90307400 | -1.47123900 |
| Cl | -0.71391600  | -3.12850200 | 1.13734500  |
| Mg | 1.06148400   | -3.22013500 | -0.24992700 |
| Cl | 5.39929100   | -3.97490600 | 0.66200000  |
| Mg | 7.17467200   | -4.06664900 | -0.72532800 |
| Cl | 2.87068000   | -3.31550900 | -1.59249400 |
| Cl | 8.93574600   | -4.15699600 | -2.12282100 |
| Cl | -15.14017100 | 0.19306500  | 0.05703900  |
| Mg | -12.99075600 | -0.18735700 | 0.46723900  |
| Cl | -11.40862100 | -0.50327200 | -1.16332600 |
| Mg | -7.34574900  | -0.69875600 | 0.09399300  |
| Cl | -9.30265700  | -0.71805500 | 1.64945500  |
| Cl | -5.37893200  | -0.71211600 | -1.33964600 |
| Mg | -1.61234600  | -1.12855200 | -0.10888500 |
| Cl | -3.42678200  | -1.10482300 | 1.50987700  |
| Cl | 0.20472000   | -1.28474600 | -1.72774400 |
| Mg | 4.26696800   | -1.53815000 | -0.16675000 |
| Mg | 10.28208400  | -2.61487900 | -0.75836000 |
| Cl | 2.22255100   | -1.42257700 | 1.17885800  |
| Cl | 6.44099800   | -2.14492600 | -1.91585500 |

|    |              |             |             |
|----|--------------|-------------|-------------|
| Cl | 8.44518600   | -2.85524600 | 1.02437400  |
| Cl | 12.39875800  | -3.10961700 | -0.27945000 |
| Cl | -11.91498700 | 1.83309400  | 1.38336900  |
| Mg | -10.04658100 | 1.13611100  | 0.22596500  |
| Cl | -6.38608100  | 0.99908500  | 1.60706700  |
| Cl | -8.25967600  | 1.29936100  | -1.20157400 |
| Mg | -4.36115300  | 0.92465100  | 0.41800400  |
| Cl | -0.35924000  | 0.68950200  | 1.24555800  |
| Cl | -2.50785600  | 0.99917300  | -1.27629600 |
| Mg | 1.45751300   | 0.44803700  | -0.46834200 |
| Cl | 5.56947600   | -0.57744300 | 1.08346800  |
| Cl | 3.56763600   | 0.41109900  | -1.48825100 |
| Mg | 7.53809700   | -0.95256100 | -0.04449100 |
| Cl | 9.60117100   | -0.41797100 | -1.06886300 |
| Ti | -1.31204800  | 2.95687500  | -0.03966700 |
| Cl | -3.29332800  | 2.87507500  | 1.40302700  |
| Cl | 0.84898600   | 2.71102600  | -1.14221200 |
| C  | -1.82964700  | 4.20996500  | -1.57954600 |
| C  | -0.70426100  | 4.87610800  | 1.24278100  |
| H  | -2.63631800  | 4.59573300  | -0.89803900 |
| H  | -2.32942100  | 3.56865600  | -2.33112800 |
| C  | -1.06704700  | 5.35407500  | -2.26810300 |
| C  | 0.02844400   | 3.98998100  | 1.99206300  |
| H  | -0.26115200  | 5.33644000  | 0.35116200  |
| C  | -0.36094800  | 3.49062800  | 3.34816500  |
| H  | 1.01860700   | 3.69425000  | 1.61989800  |
| C  | -0.55752400  | 4.90873100  | -3.64870300 |
| C  | -1.94163700  | 6.61788700  | -2.38551600 |
| H  | -0.17605500  | 5.62262500  | -1.66305900 |
| H  | 0.04378900   | 5.70371400  | -4.12049700 |
| H  | 0.06575100   | 4.00435600  | -3.57442900 |
| H  | -1.40655800  | 4.68553700  | -4.31846200 |
| H  | -1.38672200  | 7.43753900  | -2.87332500 |
| H  | -2.84246100  | 6.41378300  | -2.98948600 |
| H  | -2.27323000  | 6.97621800  | -1.39585100 |
| S  | 8.42357300   | 2.90119100  | 0.60474700  |
| C  | 6.77896800   | 3.28876100  | -1.61392400 |
| C  | 9.46229200   | 1.87569400  | 2.97109600  |
| C  | 9.67530000   | 3.20972100  | 3.38233800  |
| C  | 10.41195900  | 3.47294400  | 4.54096400  |
| C  | 10.94094000  | 2.41359100  | 5.29508500  |
| C  | 10.72788200  | 1.08482100  | 4.89348400  |
| C  | 9.98934500   | 0.81214600  | 3.74022300  |
| C  | 6.09952700   | 2.83827300  | -2.76993500 |
| C  | 5.56861600   | 3.76328600  | -3.67144700 |
| C  | 5.70728000   | 5.13995400  | -3.43158600 |
| C  | 6.37624300   | 5.59293300  | -2.28322300 |
| C  | 6.90990500   | 4.67452200  | -1.37443200 |
| H  | 9.25165000   | 4.03969100  | 2.81025700  |
| H  | 10.57057200  | 4.50677000  | 4.85961100  |
| H  | 11.51999300  | 2.62454400  | 6.19899400  |
| H  | 11.14289000  | 0.25993100  | 5.47895800  |
| H  | 9.81804100   | -0.21500900 | 3.40908300  |
| H  | 5.99808900   | 1.76393300  | -2.93825000 |
| H  | 5.04522900   | 3.40957100  | -4.56384000 |
| H  | 5.29186200   | 5.86262800  | -4.14029000 |
| H  | 6.47834700   | 6.66499700  | -2.09380400 |
| H  | 7.41363600   | 5.03691300  | -0.47415800 |



|   |             |            |            |
|---|-------------|------------|------------|
| H | -1.63586500 | 5.31069400 | 1.62013700 |
| H | 0.34348500  | 3.91030700 | 4.09066800 |
| H | -1.38148300 | 3.79246200 | 3.62524600 |
| H | -0.27758600 | 2.39467700 | 3.42145300 |

**Dibenzoyl sulfide (TS 2,1-re)**

|    |              |             |             |
|----|--------------|-------------|-------------|
| C  | 7.33355800   | 2.22221300  | -0.76774900 |
| C  | 8.70270300   | 1.53053300  | 1.71422300  |
| O  | 8.34598000   | 0.36993300  | 1.51600600  |
| O  | 7.07835100   | 1.02690100  | -0.88949600 |
| Cl | -12.40921500 | -2.54775700 | 1.33586000  |
| Mg | -10.41989800 | -2.41351600 | 0.12399500  |
| Cl | -6.36469000  | -2.71680200 | 1.32432000  |
| Mg | -4.58090200  | -2.83421500 | -0.04999400 |
| Cl | -8.61239800  | -2.53298300 | -1.21902400 |
| Cl | -2.80461800  | -2.95104300 | -1.43440600 |
| Cl | -0.70477000  | -3.12485200 | 1.17908000  |
| Mg | 1.07151500   | -3.24158000 | -0.20533100 |
| Cl | 5.40936200   | -3.97526700 | 0.72313400  |
| Mg | 7.18554600   | -4.09209400 | -0.66127800 |
| Cl | 2.88141500   | -3.36114200 | -1.54485200 |
| Cl | 8.94742700   | -4.20773000 | -2.05588600 |
| Cl | -15.13308800 | 0.16382600  | 0.02806700  |
| Mg | -12.98358800 | -0.20695000 | 0.44656700  |
| Cl | -11.40034300 | -0.55271500 | -1.17684900 |
| Mg | -7.33796900  | -0.72086700 | 0.08607000  |
| Cl | -9.29569100  | -0.71197200 | 1.64060300  |
| Cl | -5.37022500  | -0.76009900 | -1.34609800 |
| Mg | -1.60439000  | -1.14979700 | -0.10545400 |
| Cl | -3.41943900  | -1.09660900 | 1.51141700  |
| Cl | 0.21392400   | -1.33548400 | -1.72033100 |
| Mg | 4.27557600   | -1.55565300 | -0.15259400 |
| Mg | 10.29181900  | -2.63871800 | -0.72047700 |
| Cl | 2.23079700   | -1.41604500 | 1.18928300  |
| Cl | 6.45097100   | -2.19408100 | -1.88871200 |
| Cl | 8.45417400   | -2.84642900 | 1.06558800  |
| Cl | 12.40863300  | -3.12250200 | -0.23111000 |
| Cl | -11.90990900 | 1.83151700  | 1.32444100  |
| Mg | -10.04034000 | 1.11403300  | 0.18153400  |
| Cl | -6.38045100  | 1.00636800  | 1.56689300  |
| Cl | -8.25281300  | 1.25139300  | -1.24795200 |
| Mg | -4.35525900  | 0.91122800  | 0.38062500  |
| Cl | -0.35262000  | 0.69467600  | 1.21447800  |
| Cl | -2.50004400  | 0.95442500  | -1.31438000 |
| Mg | 1.46326400   | 0.42188300  | -0.49330300 |
| Cl | 5.57662200   | -0.57023000 | 1.07964000  |
| Cl | 3.57537000   | 0.36733000  | -1.51149800 |
| Mg | 7.54613400   | -0.96526400 | -0.03993200 |
| Cl | 9.60932200   | -0.44869900 | -1.07328500 |
| Ti | -1.24708700  | 2.85771500  | 0.00821600  |
| Cl | -3.37045300  | 2.92478900  | 1.27574100  |
| Cl | 0.69172600   | 2.55217200  | -1.43091800 |
| C  | -1.73618000  | 4.72548500  | -0.88194800 |
| C  | -0.30901900  | 4.96928800  | 0.85436900  |
| H  | -2.61431800  | 5.20384700  | -0.41332600 |
| H  | -2.14050800  | 3.79023700  | -1.40896600 |
| C  | -1.09920000  | 5.61749100  | -1.95037000 |
| C  | -0.05123300  | 3.86436900  | 1.67488900  |

|   |             |             |             |
|---|-------------|-------------|-------------|
| H | 0.43698300  | 5.27508200  | 0.11638100  |
| C | -0.64971900 | 3.69390500  | 3.05482100  |
| H | 0.89407300  | 3.33728800  | 1.48414200  |
| C | -1.83885500 | 5.42830100  | -3.29325000 |
| C | -1.10657200 | 7.10220900  | -1.54704600 |
| H | -0.05273400 | 5.28957300  | -2.10540400 |
| H | -1.38918600 | 6.06775500  | -4.07096600 |
| H | -1.78201100 | 4.38333100  | -3.64032200 |
| H | -2.90334200 | 5.70551500  | -3.20357400 |
| H | -0.65642200 | 7.71705100  | -2.34332200 |
| H | -2.14084900 | 7.45773600  | -1.39454500 |
| H | -0.54292700 | 7.29670700  | -0.62119200 |
| S | 8.43033600  | 2.90148400  | 0.53734200  |
| C | 6.80809900  | 3.24242500  | -1.70607400 |
| C | 9.44763100  | 1.92414300  | 2.93387700  |
| C | 9.65730500  | 3.26647100  | 3.31904200  |
| C | 10.37980100 | 3.55371100  | 4.48087000  |
| C | 10.89767300 | 2.51027100  | 5.26428400  |
| C | 10.68790300 | 1.17340500  | 4.88863300  |
| C | 9.96373100  | 0.87682400  | 3.73218500  |
| C | 6.11538800  | 2.76615200  | -2.84364000 |
| C | 5.59628100  | 3.67008600  | -3.77307700 |
| C | 5.76119200  | 5.05120500  | -3.58021100 |
| C | 6.44411900  | 5.52996500  | -2.45065100 |
| C | 6.96515700  | 4.63277100  | -1.51370900 |
| H | 9.24196700  | 4.08454300  | 2.72420200  |
| H | 10.53579400 | 4.59397500  | 4.77919800  |
| H | 11.46539100 | 2.73999500  | 6.17080000  |
| H | 11.09410900 | 0.36082300  | 5.49703300  |
| H | 9.79505500  | -0.15705600 | 3.42122700  |
| H | 5.99391900  | 1.68885700  | -2.97576700 |
| H | 5.06214700  | 3.29615200  | -4.65074900 |
| H | 5.35611700  | 5.75728500  | -4.31132300 |
| H | 6.56790800  | 6.60566700  | -2.29827500 |
| H | 7.48121600  | 5.01612500  | -0.62922700 |
| H | -1.00084800 | 5.74455300  | 1.19830800  |
| H | 0.06841600  | 4.06828900  | 3.80750700  |
| H | -1.58668400 | 4.26025800  | 3.16498600  |
| H | -0.85663800 | 2.64006300  | 3.29571700  |

**Diisobutyl phthalate (Reactant 1,2-si)**

|   |             |            |             |
|---|-------------|------------|-------------|
| C | 8.83016600  | 2.69502500 | 1.22497100  |
| C | 9.67386000  | 3.58375800 | 1.92449700  |
| C | 10.18542000 | 4.74008500 | 1.32659700  |
| C | 9.84502000  | 5.04196300 | 0.00400500  |
| C | 8.99838000  | 4.18295200 | -0.70189300 |
| C | 8.48192400  | 3.00439000 | -0.12339400 |
| C | 7.55443100  | 2.17711300 | -0.95691000 |
| O | 7.43913200  | 2.62671400 | -2.21006200 |
| C | 6.60567500  | 1.81895900 | -3.11028600 |
| C | 6.72595800  | 2.39866100 | -4.51756700 |
| C | 8.45602900  | 1.45812000 | 1.99883900  |
| O | 8.47331200  | 0.28986000 | 1.59201400  |
| O | 8.20116800  | 1.75680000 | 3.27816400  |
| C | 7.94601400  | 0.62205000 | 4.17533200  |
| C | 7.55124100  | 1.17627400 | 5.54128800  |
| H | 9.94118700  | 3.34434800 | 2.95551300  |
| H | 10.84653500 | 5.39844400 | 1.89699300  |

|    |              |             |             |
|----|--------------|-------------|-------------|
| H  | 10.23313500  | 5.94228000  | -0.48011900 |
| H  | 8.71885500   | 4.41831400  | -1.72978100 |
| H  | 5.57073100   | 1.84821200  | -2.73060400 |
| H  | 6.96706100   | 0.77869500  | -3.05877300 |
| H  | 8.87034700   | 0.01907700  | 4.22836100  |
| H  | 7.15045000   | 0.00630000  | 3.72751000  |
| C  | 8.65903700   | 2.04347400  | 6.15753900  |
| C  | 7.17922200   | -0.00161400 | 6.45746900  |
| C  | 8.16415900   | 2.30526600  | -5.05267700 |
| C  | 6.16846800   | 3.82885400  | -4.60266500 |
| H  | 6.08352200   | 1.74205300  | -5.13669500 |
| H  | 6.65047900   | 1.80197100  | 5.39335100  |
| H  | 9.57700500   | 1.45110200  | 6.31920700  |
| H  | 8.34379600   | 2.44400700  | 7.13468200  |
| H  | 8.91253800   | 2.89715200  | 5.50910000  |
| H  | 6.85265900   | 0.36498700  | 7.44361300  |
| H  | 8.04533500   | -0.66648700 | 6.61980900  |
| H  | 6.36229500   | -0.60714200 | 6.03221100  |
| H  | 8.54080400   | 1.26999300  | -5.01689300 |
| H  | 8.84894900   | 2.92997200  | -4.45581200 |
| H  | 8.21552800   | 2.65186800  | -6.09735300 |
| H  | 6.76004900   | 4.52152000  | -3.98091300 |
| H  | 5.12159700   | 3.87562000  | -4.25875300 |
| H  | 6.20143300   | 4.19968400  | -5.63976200 |
| O  | 6.92521400   | 1.18810800  | -0.55761600 |
| Cl | -12.46381900 | -2.28594700 | 1.18667900  |
| Mg | -10.66089400 | -2.30714600 | -0.16763200 |
| Cl | -6.69186400  | -2.74976600 | 1.13123200  |
| Mg | -4.88237900  | -2.81672300 | -0.21273000 |
| Cl | -8.83477900  | -2.33248900 | -1.49040100 |
| Cl | -3.08038900  | -2.88218800 | -1.56663100 |
| Cl | -1.03782700  | -3.24814000 | 1.07205600  |
| Mg | 0.76445400   | -3.31364500 | -0.28183800 |
| Cl | 5.06978900   | -4.17755800 | 0.68529500  |
| Mg | 6.87101700   | -4.24327900 | -0.66808600 |
| Cl | 2.59923600   | -3.38533600 | -1.59079500 |
| Cl | 8.65964800   | -4.30679900 | -2.03313500 |
| Cl | -15.37100800 | 0.27763300  | -0.14403300 |
| Mg | -13.22780700 | -0.12533500 | 0.27691900  |
| Cl | -11.62198200 | -0.35625000 | -1.34482400 |
| Mg | -7.60664200  | -0.66685300 | -0.00400500 |
| Cl | -9.59544500  | -0.71596200 | 1.50970400  |
| Cl | -5.61054100  | -0.65578700 | -1.39764500 |
| Mg | -1.87851900  | -1.18477500 | -0.10917200 |
| Cl | -3.72486500  | -1.19566000 | 1.47226400  |
| Cl | -0.03039100  | -1.30597900 | -1.69655700 |
| Mg | 3.99413700   | -1.69176100 | -0.06529300 |
| Mg | 10.00277800  | -2.84364100 | -0.57926300 |
| Cl | 1.92511700   | -1.59485300 | 1.24165700  |
| Cl | 6.19501100   | -2.26444000 | -1.79419900 |
| Cl | 8.12446100   | -3.12656500 | 1.14871300  |
| Cl | 12.10016600  | -3.39319800 | -0.07955300 |
| Cl | -12.17248500 | 1.87234100  | 1.29989200  |
| Mg | -10.29626800 | 1.17957300  | 0.14050500  |
| Cl | -6.63127100  | 0.95065500  | 1.60075900  |
| Cl | -8.48854600  | 1.35857600  | -1.25834300 |
| Mg | -4.59916200  | 0.86627300  | 0.42464200  |
| Cl | -0.62550400  | 0.58185400  | 1.31863300  |

|    |             |             |             |
|----|-------------|-------------|-------------|
| Cl | -2.72406800 | 0.99225300  | -1.25284400 |
| Mg | 1.23474400  | 0.30816400  | -0.32858700 |
| Cl | 5.48801000  | -0.29563100 | 1.55097600  |
| Cl | 3.38185400  | 0.33489800  | -1.30528100 |
| Mg | 7.40640300  | -0.78535300 | 0.09637300  |
| Cl | 9.41379900  | -0.30691100 | -1.29532700 |
| Ti | -1.51637600 | 2.89447700  | 0.06006900  |
| Cl | -3.50186500 | 2.77965800  | 1.46192900  |
| Cl | 0.56870900  | 2.51746100  | -1.15350000 |
| C  | -1.94764500 | 4.27071500  | -1.39951200 |
| C  | -0.89883500 | 4.96116000  | 1.50257200  |
| H  | -2.81074100 | 4.65841500  | -0.79964600 |
| H  | -2.37994400 | 3.65824800  | -2.21583500 |
| C  | -1.07574400 | 5.40873600  | -1.96949600 |
| C  | -0.20001200 | 3.83077100  | 1.85066900  |
| H  | -0.50644600 | 5.56844800  | 0.67549300  |
| H  | -0.49535800 | 3.23389100  | 2.72184800  |
| H  | 0.77129000  | 3.60961800  | 1.39857800  |
| C  | -2.03400400 | 5.56284200  | 2.27471500  |
| H  | -2.88249500 | 5.83809800  | 1.62693500  |
| H  | -2.39599700 | 4.89824800  | 3.07214600  |
| H  | -1.67492400 | 6.49999100  | 2.74009600  |
| C  | -0.66809300 | 5.10696500  | -3.42095800 |
| C  | -1.78749800 | 6.77091100  | -1.86739000 |
| H  | -0.13571000 | 5.47825300  | -1.38264500 |
| H  | 0.01157200  | 5.88390700  | -3.80923400 |
| H  | -0.15554300 | 4.13528000  | -3.49686900 |
| H  | -1.55763300 | 5.07733600  | -4.07449900 |
| H  | -1.15007100 | 7.58126200  | -2.26025200 |
| H  | -2.72483000 | 6.76537100  | -2.45006500 |
| H  | -2.04470500 | 7.02093100  | -0.82315300 |

**Diisobutyl phthalate (TS 1,2-sj)**

|   |             |            |             |
|---|-------------|------------|-------------|
| C | 8.83587900  | 2.70038900 | 1.16374900  |
| C | 9.68304500  | 3.59812600 | 1.84737600  |
| C | 10.19779300 | 4.74249300 | 1.22949500  |
| C | 9.85711000  | 5.02304600 | -0.09771900 |
| C | 9.00674700  | 4.15513300 | -0.78807600 |
| C | 8.48703700  | 2.98823400 | -0.18923500 |
| C | 7.55586700  | 2.15003700 | -1.00754500 |
| O | 7.43762700  | 2.58070100 | -2.26709800 |
| C | 6.60130300  | 1.75969800 | -3.15259200 |
| C | 6.71216400  | 2.32266500 | -4.56744700 |
| C | 8.45897900  | 1.47756600 | 1.95847700  |
| O | 8.47326700  | 0.30263000 | 1.57124500  |
| O | 8.20561400  | 1.79828900 | 3.23270200  |
| C | 7.94882600  | 0.67931800 | 4.14913500  |
| C | 7.55988100  | 1.25739200 | 5.50686000  |
| H | 9.95061500  | 3.37525300 | 2.88203100  |
| H | 10.86169700 | 5.40816700 | 1.78802900  |
| H | 10.24791300 | 5.91361100 | -0.59746100 |
| H | 8.72685300  | 4.37409000 | -1.81948500 |
| H | 5.56835100  | 1.79062200 | -2.76766600 |
| H | 6.96575800  | 0.72103800 | -3.09014200 |
| H | 8.87106200  | 0.07384200 | 4.20946300  |
| H | 7.14979700  | 0.05924600 | 3.71358300  |
| C | 8.67335400  | 2.12891100 | 6.10653600  |
| C | 7.18403800  | 0.09634100 | 6.44273000  |

|    |              |             |             |
|----|--------------|-------------|-------------|
| C  | 8.14763200   | 2.22749700  | -5.10949400 |
| C  | 6.14973200   | 3.75004100  | -4.66624800 |
| H  | 6.06838400   | 1.65680600  | -5.17517000 |
| H  | 6.66184500   | 1.88507000  | 5.35088700  |
| H  | 9.58908200   | 1.53489400  | 6.27467600  |
| H  | 8.36277700   | 2.54592600  | 7.07824300  |
| H  | 8.92877300   | 2.97127100  | 5.44419500  |
| H  | 6.86141700   | 0.48056200  | 7.42345100  |
| H  | 8.04708500   | -0.57026500 | 6.61412000  |
| H  | 6.36312700   | -0.51188900 | 6.02914700  |
| H  | 8.52814000   | 1.19408600  | -5.06272900 |
| H  | 8.83359300   | 2.86221500  | -4.52465400 |
| H  | 8.19177500   | 2.56090200  | -6.15879100 |
| H  | 6.74182500   | 4.45147100  | -4.05488600 |
| H  | 5.10422400   | 3.79723400  | -4.31823300 |
| H  | 6.17692800   | 4.10921800  | -5.70760200 |
| O  | 6.92594500   | 1.16836200  | -0.59169600 |
| Cl | -12.46513700 | -2.27499900 | 1.21588900  |
| Mg | -10.66264500 | -2.31978200 | -0.13839400 |
| Cl | -6.69318400  | -2.74024600 | 1.16674400  |
| Mg | -4.88418900  | -2.83056400 | -0.17641800 |
| Cl | -8.83688900  | -2.36821200 | -1.46108900 |
| Cl | -3.08256500  | -2.91964800 | -1.52960200 |
| Cl | -1.03915600  | -3.24004700 | 1.11444500  |
| Mg | 0.76256900   | -3.32913100 | -0.23874000 |
| Cl | 5.06817200   | -4.17649700 | 0.74190800  |
| Mg | 6.86900000   | -4.26578900 | -0.61067500 |
| Cl | 2.59701000   | -3.42356600 | -1.54676500 |
| Cl | 8.65724800   | -4.35308700 | -1.97502700 |
| Cl | -15.37248300 | 0.26539000  | -0.15805500 |
| Mg | -13.22915200 | -0.13042400 | 0.26910600  |
| Cl | -11.62390900 | -0.38954900 | -1.34892200 |
| Mg | -7.60824200  | -0.67710100 | -0.00421500 |
| Cl | -9.59648900  | -0.69989100 | 1.51079600  |
| Cl | -5.61295300  | -0.69022700 | -1.39825900 |
| Mg | -1.87985400  | -1.19737800 | -0.10218100 |
| Cl | -3.72600000  | -1.18068000 | 1.47986200  |
| Cl | -0.03247000  | -1.34623900 | -1.68773400 |
| Mg | 3.99252900   | -1.70398700 | -0.05131900 |
| Mg | 10.00094200  | -2.86507400 | -0.54706400 |
| Cl | 1.92368400   | -1.58434300 | 1.25454800  |
| Cl | 6.19283400   | -2.30666400 | -1.77065800 |
| Cl | 8.12314000   | -3.11794300 | 1.18614700  |
| Cl | 12.09836400  | -3.40606200 | -0.03863000 |
| Cl | -12.17342500 | 1.88458100  | 1.25697100  |
| Mg | -10.29760200 | 1.17168100  | 0.10922300  |
| Cl | -6.63218800  | 0.96775600  | 1.57200600  |
| Cl | -8.49031200  | 1.32634000  | -1.29309800 |
| Mg | -4.59878600  | 0.86242000  | 0.39711300  |
| Cl | -0.62784400  | 0.59366900  | 1.29431800  |
| Cl | -2.72623300  | 0.95954200  | -1.28311100 |
| Mg | 1.23387400   | 0.29182500  | -0.34826300 |
| Cl | 5.48704200   | -0.28017800 | 1.54009800  |
| Cl | 3.38002000   | 0.30088300  | -1.32600300 |
| Mg | 7.40493100   | -0.79516000 | 0.09364400  |
| Cl | 9.41188900   | -0.34105900 | -1.30684000 |
| Ti | -1.45135600  | 2.79778600  | 0.09048100  |
| Cl | -3.59670400  | 2.85731100  | 1.33301900  |

|    |             |            |             |
|----|-------------|------------|-------------|
| Cl | 0.51604800  | 2.45331900 | -1.28774800 |
| C  | -1.86241500 | 4.69576800 | -0.78411000 |
| C  | -0.70078700 | 4.94599300 | 1.23526600  |
| H  | -2.75002600 | 5.23411900 | -0.40977600 |
| H  | -2.29167400 | 3.78552200 | -1.33200900 |
| C  | -1.06838100 | 5.52451700 | -1.80218300 |
| C  | -0.36421800 | 3.70511000 | 1.79657600  |
| H  | 0.04834100  | 5.41513400 | 0.58774000  |
| H  | -0.89648500 | 3.34528600 | 2.68475500  |
| H  | 0.63701600  | 3.29697200 | 1.62167900  |
| C  | -1.69344000 | 5.86264200 | 1.90350400  |
| H  | -2.09169700 | 6.63623300 | 1.23242700  |
| H  | -2.53070100 | 5.30054300 | 2.34405900  |
| H  | -1.16513900 | 6.37759400 | 2.72674800  |
| C  | -1.65512500 | 5.31172600 | -3.21536300 |
| C  | -1.04976200 | 7.02396900 | -1.45912100 |
| H  | -0.02572500 | 5.15358700 | -1.82456400 |
| H  | -1.09163700 | 5.90005300 | -3.95869700 |
| H  | -1.60394200 | 4.25174900 | -3.51460700 |
| H  | -2.71012800 | 5.63362000 | -3.25992300 |
| H  | -0.49131800 | 7.58381400 | -2.22698600 |
| H  | -2.07530900 | 7.43280600 | -1.42840600 |
| H  | -0.57217600 | 7.23625300 | -0.48906000 |

**Diisobutyl phthalate (Reactant 1,2-re)**

|    |              |             |             |
|----|--------------|-------------|-------------|
| Cl | -12.37486600 | -2.09873400 | 1.62994100  |
| Mg | -10.64460700 | -2.27101200 | 0.19423700  |
| Cl | -6.60527600  | -2.73283200 | 1.29972900  |
| Mg | -4.87120900  | -2.93424400 | -0.12763500 |
| Cl | -8.88960200  | -2.44612300 | -1.21095200 |
| Cl | -3.14501400  | -3.13481600 | -1.56460400 |
| Cl | -0.97473400  | -3.38048600 | 0.98467800  |
| Mg | 0.75144900   | -3.58095900 | -0.45227200 |
| Cl | 5.22292600   | -3.93143000 | 0.89562900  |
| Mg | 6.94897500   | -4.13200400 | -0.54130400 |
| Cl | 2.51258800   | -3.78550500 | -1.84568700 |
| Cl | 8.66057800   | -4.33087700 | -1.98831700 |
| Cl | -15.27313700 | 0.45614600  | 0.26381100  |
| Mg | -13.12342400 | 0.01616200  | 0.60713200  |
| Cl | -11.60946200 | -0.37764900 | -1.07065900 |
| Mg | -7.53180800  | -0.70476900 | 0.07626800  |
| Cl | -9.43730500  | -0.60193500 | 1.68972900  |
| Cl | -5.61512100  | -0.83816100 | -1.41517800 |
| Mg | -1.82897100  | -1.37740600 | -0.28834000 |
| Cl | -3.59002800  | -1.23301700 | 1.38210700  |
| Cl | -0.07106300  | -1.65143200 | -1.95670300 |
| Mg | 4.02697100   | -2.02911500 | -0.50632400 |
| Mg | 10.11207800  | -2.81608000 | -0.70390400 |
| Cl | 2.02793900   | -1.79161000 | 0.88855700  |
| Cl | 6.24710100   | -2.06501400 | -1.76995000 |
| Cl | 8.32295900   | -2.93462700 | 1.13875500  |
| Cl | 12.22013200  | -3.38916400 | -0.27617400 |
| Cl | -11.95179900 | 2.04596300  | 1.43315800  |
| Mg | -10.15018900 | 1.24265700  | 0.23842500  |
| Cl | -6.45864000  | 0.99737000  | 1.50772300  |
| Cl | -8.40621200  | 1.29423400  | -1.24945400 |
| Mg | -4.47478700  | 0.80475000  | 0.26361300  |
| Cl | -0.45842500  | 0.43010800  | 0.96860000  |

|    |             |             |             |
|----|-------------|-------------|-------------|
| Cl | -2.68041600 | 0.74839100  | -1.49357500 |
| Mg | 1.28947500  | 0.06402100  | -0.79042200 |
| Cl | 5.55254100  | -0.32907200 | 1.21566500  |
| Cl | 3.37246600  | -0.08365800 | -1.85725100 |
| Mg | 7.45014800  | -0.87796900 | 0.03816000  |
| Cl | 9.50338200  | -0.53198900 | -1.03158000 |
| Ti | -1.36304300 | 2.63140300  | -0.32599600 |
| Cl | -3.31292100 | 2.73769600  | 1.15142400  |
| Cl | 0.62295800  | 2.21476900  | -1.71872300 |
| C  | -1.85128800 | 4.35067000  | -1.32874600 |
| C  | -0.10252600 | 4.73497500  | 0.94691400  |
| H  | -1.02981000 | 4.67480400  | -1.99418100 |
| H  | -2.36353100 | 3.50081700  | -1.89095000 |
| C  | -2.86952300 | 5.47119700  | -1.05555600 |
| C  | -0.01691200 | 3.52981100  | 1.58107600  |
| C  | 1.01465900  | 5.35107700  | 0.16036400  |
| H  | -0.76640600 | 3.21501600  | 2.31439300  |
| H  | 0.90339400  | 2.93954800  | 1.51770800  |
| H  | -0.99269500 | 5.35240800  | 1.12203400  |
| C  | -2.22010800 | 6.86263400  | -1.13805700 |
| C  | -4.05873000 | 5.37911500  | -2.03370400 |
| H  | -3.27806300 | 5.33481200  | -0.03564700 |
| H  | -2.95869400 | 7.64830600  | -0.90890800 |
| H  | -1.38293000 | 6.98117400  | -0.43172400 |
| H  | -1.83200300 | 7.05275800  | -2.15435500 |
| H  | -4.79497200 | 6.17462700  | -1.82888400 |
| H  | -3.72058200 | 5.48946300  | -3.07863400 |
| H  | -4.57848000 | 4.41047400  | -1.94372900 |
| H  | 1.45582600  | 6.16843400  | 0.76067900  |
| H  | 1.80710800  | 4.62204900  | -0.06477700 |
| H  | 0.66592900  | 5.80223200  | -0.78093700 |
| C  | 9.09036000  | 2.58536900  | 1.15669900  |
| C  | 10.14905800 | 3.29475300  | 1.75954200  |
| C  | 10.82542700 | 4.31476100  | 1.08279800  |
| C  | 10.42475100 | 4.66933700  | -0.21028200 |
| C  | 9.34987000  | 4.00457800  | -0.80698200 |
| C  | 8.67333900  | 2.95220700  | -0.15304900 |
| C  | 7.53818800  | 2.31492900  | -0.89729600 |
| O  | 6.98164400  | 3.17461900  | -1.77236000 |
| C  | 5.94784200  | 2.62016900  | -2.64950800 |
| C  | 5.23669100  | 3.77949900  | -3.34571400 |
| C  | 8.52606700  | 1.46976300  | 1.99234000  |
| O  | 8.38051700  | 0.29614200  | 1.64894500  |
| O  | 8.28395800  | 1.88499900  | 3.24612100  |
| C  | 7.80875300  | 0.85280700  | 4.17521800  |
| C  | 7.48639700  | 1.52494700  | 5.50683700  |
| H  | 10.44846800 | 3.02226400  | 2.77407600  |
| H  | 11.65919500 | 4.82935000  | 1.56853200  |
| H  | 10.94210200 | 5.46418300  | -0.75460800 |
| H  | 9.02032800  | 4.28932500  | -1.80759300 |
| H  | 5.25806700  | 2.01395300  | -2.04224200 |
| H  | 6.44772400  | 1.95036900  | -3.37098300 |
| H  | 8.60584600  | 0.09504800  | 4.28149200  |
| H  | 6.92936200  | 0.36598400  | 3.72337000  |
| C  | 8.72169200  | 2.19420200  | 6.12740000  |
| C  | 6.87481100  | 0.47751500  | 6.45217300  |
| C  | 6.19608800  | 4.61919900  | -4.20421400 |
| C  | 4.45774500  | 4.64496300  | -2.34131300 |

|   |            |             |             |
|---|------------|-------------|-------------|
| H | 4.50535000 | 3.29063800  | -4.01856400 |
| H | 6.72460200 | 2.30273900  | 5.30689900  |
| H | 9.50293100 | 1.44532400  | 6.34786400  |
| H | 8.46257000 | 2.69524400  | 7.07424300  |
| H | 9.15291600 | 2.94872300  | 5.45069700  |
| H | 6.59821700 | 0.93888600  | 7.41363700  |
| H | 7.59533100 | -0.33105500 | 6.66612300  |
| H | 5.96967500 | 0.01811600  | 6.02218000  |
| H | 6.73118600 | 3.99575000  | -4.93982900 |
| H | 6.94806900 | 5.12264300  | -3.57437300 |
| H | 5.64728100 | 5.39802500  | -4.75796600 |
| H | 5.14114900 | 5.10524900  | -1.60839100 |
| H | 3.71745900 | 4.04052800  | -1.78979200 |
| H | 3.91776100 | 5.45534200  | -2.85785600 |
| O | 7.13710800 | 1.15486800  | -0.78548500 |

**Diisobutyl phthalate (TS 1,2-re)**

|    |              |             |             |
|----|--------------|-------------|-------------|
| Cl | -12.37023600 | -2.11412400 | 1.63037800  |
| Mg | -10.64049600 | -2.28125800 | 0.19344000  |
| Cl | -6.60048500  | -2.74448900 | 1.29585200  |
| Mg | -4.86691600  | -2.94077900 | -0.13284000 |
| Cl | -8.88599700  | -2.45130400 | -1.21300100 |
| Cl | -3.14123300  | -3.13620600 | -1.57111900 |
| Cl | -0.96977100  | -3.38852000 | 0.97650600  |
| Mg | 0.75590700   | -3.58384800 | -0.46176500 |
| Cl | 5.22811200   | -3.93625500 | 0.88321100  |
| Mg | 6.95365500   | -4.13168300 | -0.55503900 |
| Cl | 2.51655900   | -3.78336100 | -1.85652200 |
| Cl | 8.66474600   | -4.32538600 | -2.00335800 |
| Cl | -15.27028600 | 0.44348300  | 0.27315700  |
| Mg | -13.12022200 | 0.00348700  | 0.61425500  |
| Cl | -11.60677600 | -0.38455200 | -1.06534600 |
| Mg | -7.52848600  | -0.71319500 | 0.07889300  |
| Cl | -9.43335800  | -0.61611900 | 1.69344800  |
| Cl | -5.61233200  | -0.84119600 | -1.41375700 |
| Mg | -1.82549600  | -1.38202000 | -0.29011800 |
| Cl | -3.58590700  | -1.24349700 | 1.38148600  |
| Cl | -0.06814400  | -1.65019200 | -1.96003400 |
| Mg | 4.03067000   | -2.03029500 | -0.51251000 |
| Mg | 10.11606600  | -2.81377500 | -0.71499500 |
| Cl | 2.03211900   | -1.79793700 | 0.88391300  |
| Cl | 6.25028900   | -2.06133500 | -1.77716200 |
| Cl | 8.32777500   | -2.93871800 | 1.12804500  |
| Cl | 12.22457000  | -3.38714400 | -0.28987200 |
| Cl | -11.94921200 | 2.03134700  | 1.44590100  |
| Mg | -10.14772200 | 1.23249600  | 0.24800300  |
| Cl | -6.45551400  | 0.98518900  | 1.51503000  |
| Cl | -8.40439200  | 1.28938000  | -1.24044100 |
| Mg | -4.47220100  | 0.79717000  | 0.26950600  |
| Cl | -0.45523600  | 0.42230200  | 0.97166900  |
| Cl | -2.67840900  | 0.74700700  | -1.48859000 |
| Mg | 1.29203800   | 0.06244100  | -0.78916200 |
| Cl | 5.55615700   | -0.33472100 | 1.21395600  |
| Cl | 3.37468400   | -0.08110700 | -1.85728800 |
| Mg | 7.45353100   | -0.87917000 | 0.03401200  |
| Cl | 9.50615300   | -0.52899600 | -1.03553700 |
| Ti | -1.29614400  | 2.60454100  | -0.26438000 |
| Cl | -3.36459100  | 2.76945100  | 1.11045200  |



|    |             |             |             |
|----|-------------|-------------|-------------|
| Cl | 0.58574700  | 2.20745300  | -1.74179400 |
| C  | -1.69629800 | 4.47913200  | -1.19441500 |
| C  | -0.37085700 | 4.75823200  | 0.71743100  |
| H  | -0.91543100 | 4.83101800  | -1.89088100 |
| H  | -2.14811800 | 3.55526600  | -1.70023800 |
| C  | -2.82709200 | 5.50193800  | -1.03006300 |
| C  | -0.13525900 | 3.54288300  | 1.37686000  |
| C  | 0.75643900  | 5.50011800  | 0.04417800  |
| H  | -0.76222000 | 3.24774600  | 2.22538500  |
| H  | 0.86345100  | 3.09446500  | 1.32543100  |
| H  | -1.22686100 | 5.35238000  | 1.05610200  |
| C  | -2.32413600 | 6.95536900  | -1.00814900 |
| C  | -3.85658900 | 5.32090800  | -2.16833200 |
| H  | -3.35388200 | 5.29178200  | -0.08016100 |
| H  | -3.17635300 | 7.65021400  | -0.93285000 |
| H  | -1.65721100 | 7.16692700  | -0.15734100 |
| H  | -1.77825500 | 7.19756900  | -1.93734600 |
| H  | -4.68196900 | 6.04363000  | -2.05753900 |
| H  | -3.39191900 | 5.48576600  | -3.15595700 |
| H  | -4.29287800 | 4.30793000  | -2.16055400 |
| H  | 1.31184200  | 6.04301800  | 0.83080800  |
| H  | 1.46114600  | 4.80914100  | -0.44394000 |
| H  | 0.41624200  | 6.24283800  | -0.69043200 |
| C  | 9.10634100  | 2.57325100  | 1.16467300  |
| C  | 10.17302100 | 3.27403800  | 1.76334300  |
| C  | 10.84956300 | 4.29395300  | 1.08660700  |
| C  | 10.44084300 | 4.65749900  | -0.20149800 |
| C  | 9.35796200  | 4.00152800  | -0.79348800 |
| C  | 8.68156900  | 2.94892800  | -0.13991400 |
| C  | 7.53817500  | 2.32089300  | -0.87912100 |
| O  | 6.97027000  | 3.19274600  | -1.73503400 |
| C  | 5.92410100  | 2.65001800  | -2.60432900 |
| C  | 5.19964900  | 3.81806000  | -3.27145000 |
| C  | 8.54006000  | 1.45745000  | 1.99851000  |
| O  | 8.38415200  | 0.28659300  | 1.65027400  |
| O  | 8.30752100  | 1.86838300  | 3.25547200  |
| C  | 7.82860000  | 0.83542700  | 4.18185900  |
| C  | 7.50940900  | 1.50503200  | 5.51549700  |
| H  | 10.47828700 | 2.99505200  | 2.77436800  |
| H  | 11.68965200 | 4.80173500  | 1.56858500  |
| H  | 10.95811800 | 5.45263600  | -0.74546600 |
| H  | 9.02197400  | 4.29342900  | -1.78993300 |
| H  | 5.24514100  | 2.03298600  | -1.99578900 |
| H  | 6.41321400  | 1.99218600  | -3.34395900 |
| H  | 8.62282700  | 0.07429500  | 4.28561400  |
| H  | 6.94710300  | 0.35328400  | 3.72909500  |
| C  | 8.74735400  | 2.16823800  | 6.13725000  |
| C  | 6.89452600  | 0.45720400  | 6.45825700  |
| C  | 6.14350600  | 4.67293700  | -4.13224500 |
| C  | 4.43499300  | 4.66709300  | -2.24225500 |
| H  | 4.45867300  | 3.33768200  | -3.93992300 |
| H  | 6.75026200  | 2.28603000  | 5.31802400  |
| H  | 9.52589500  | 1.41602000  | 6.35589500  |
| H  | 8.49026000  | 2.66807400  | 7.08527900  |
| H  | 9.18120000  | 2.92268400  | 5.46215100  |
| H  | 6.61977200  | 0.91704300  | 7.42097700  |
| H  | 7.61236900  | -0.35434900 | 6.66992300  |
| H  | 5.98767400  | 0.00202700  | 6.02739500  |

|   |            |            |             |
|---|------------|------------|-------------|
| H | 6.66774000 | 4.06183700 | -4.88581800 |
| H | 6.90463800 | 5.16780500 | -3.50665300 |
| H | 5.58462800 | 5.45917800 | -4.66501900 |
| H | 5.12885400 | 5.12404600 | -1.51717800 |
| H | 3.71046800 | 4.05141600 | -1.68200000 |
| H | 3.88002800 | 5.47954400 | -2.73941500 |
| O | 7.13981500 | 1.15883400 | -0.77968200 |
